# Supplementary material for: Lipocalin 13 enhances insulin secretion but is dispensable for systemic metabolic control
Source: Life Sci Alliance. 2021 Feb 3;4(4):e202000898. doi: 10.26508/lsa.202000898 (PMC7898469; doi:10.26508/lsa.202000898)
Supplement: Supplementary file 1 [file LSA-2020-00898_TableS1.xlsx]

## Sheet: CVT9540 Protein list
Supplementary Table 1 - Mass spectrometry analysis of recombinant mammalian proteins. Mass spectrometry analysis of the recombinant mammalian Fc-LCN13 and the Fc control after in-solution digest. The ratio of Fc-LCN13 and Fc control was calculated by the normalized abundances of these two proteins
						Normalized abundance		Raw abundance		Spectral counts
Accession	Peptide count	Unique peptides	Confidence score	Ratio His6_Fc_LCN13/ His6_Fc_Control	Description	CVT9540A2MA2__002-His6_Fc_Control_	CVT9540A3MA3__003-His6_Fc_LCN13_	CVT9540A2MA2__002-His6_Fc_Control_	CVT9540A3MA3__003-His6_Fc_LCN13_	CVT9540A2MA2__002-His6_Fc_Control_	CVT9540A3MA3__003-His6_Fc_LCN13_
A2ADY9	2	1	109.75	0	A2ADY9|DDI2_MOUSE Protein DDI1 homolog 2 OS=Mus musculus GN=Ddi2 PE=1 SV=1	51784.9	0	45769.6	0	1	0
A2AN08	1	1	31.7	0	A2AN08|UBR4_MOUSE E3 ubiquitin-protein ligase UBR4 OS=Mus musculus GN=Ubr4 PE=1 SV=1	49508.8	0	43757.9	0	1	0
E9Q784	1	1	59.98	132.661	E9Q784|ZC3HD_MOUSE Zinc finger CCCH domain-containing protein 13 OS=Mus musculus GN=Zc3h13 PE=1 SV=1	307.145	40746.2	271.467	35373.9	0	1
F6ZDS4	4	4	205.56	1.78877	F6ZDS4|TPR_MOUSE Nucleoprotein TPR OS=Mus musculus GN=Tpr PE=1 SV=1	2.07119e+06	3.70488e+06	1.8306e+06	3.2164e+06	1	0
O08553	2	2	85.93	0.0385161	O08553|DPYL2_MOUSE Dihydropyrimidinase-related protein 2 OS=Mus musculus GN=Dpysl2 PE=1 SV=2	116032	4469.11	102554	3879.86	1	0
O08663	1	1	27.48	0	O08663|MAP2_MOUSE Methionine aminopeptidase 2 OS=Mus musculus GN=Metap2 PE=1 SV=1	61614.8	0	54457.6	0	1	0
O08665	1	1	30.11	#DIV/0!	O08665|SEM3A_MOUSE Semaphorin-3A OS=Mus musculus GN=Sema3a PE=1 SV=2	0	83544	0	72528.8	0	1
O35643	2	1	71.79	0.0183678	O35643|AP1B1_MOUSE AP-1 complex subunit beta-1 OS=Mus musculus GN=Ap1b1 PE=1 SV=2	132540	2434.46	117144	2113.48	1	0
O35841	1	1	34.87	0	O35841|API5_MOUSE Apoptosis inhibitor 5 OS=Mus musculus GN=Api5 PE=1 SV=2	84759.9	0	74914.2	0	1	0
O54724	1	1	50.39	0.0400366	O54724|PTRF_MOUSE Polymerase I and transcript release factor OS=Mus musculus GN=Ptrf PE=1 SV=1	47740.6	1911.37	42195.1	1659.36	1	0
O54781	1	1	63.56	#DIV/0!	O54781|SRPK2_MOUSE SRSF protein kinase 2 OS=Mus musculus GN=Srpk2 PE=1 SV=2	0	121333	0	105335	0	1
O70194	1	1	42.15	0	O70194|EIF3D_MOUSE Eukaryotic translation initiation factor 3 subunit D OS=Mus musculus GN=Eif3d PE=1 SV=2	143559	0	126884	0	1	0
O70305	2	2	80.3	59.7583	O70305|ATX2_MOUSE Ataxin-2 OS=Mus musculus GN=Atxn2 PE=1 SV=1	1191.69	71213.1	1053.26	61823.7	0	1
O88487	1	1	58.46	0	O88487|DC1I2_MOUSE Cytoplasmic dynein 1 intermediate chain 2 OS=Mus musculus GN=Dync1i2 PE=1 SV=1	40448.4	0	35750	0	1	0
O88544	1	1	50.88	0	O88544|CSN4_MOUSE COP9 signalosome complex subunit 4 OS=Mus musculus GN=Cops4 PE=1 SV=1	50332.8	0	44486.2	0	1	0
O88844	1	1	35.14	0.0117307	O88844|IDHC_MOUSE Isocitrate dehydrogenase [NADP] cytoplasmic OS=Mus musculus GN=Idh1 PE=1 SV=2	257491	3020.55	227581	2622.29	1	0
O89023	1	1	42.86	4.85496	O89023|TPP1_MOUSE Tripeptidyl-peptidase 1 OS=Mus musculus GN=Tpp1 PE=1 SV=2	23799.5	115546	21035	100311	0	1
P05213;P68368;Q3UX10	13	1	831.33	0	P05213|TBA1B_MOUSE Tubulin alpha-1B chain OS=Mus musculus GN=Tuba1b PE=1 SV=2	464972	0	410961	0	1	0
P06797	1	1	49.03	0	P06797|CATL1_MOUSE Cathepsin L1 OS=Mus musculus GN=Ctsl PE=1 SV=2	2.26647e+06	0	2.0032e+06	0	1	0
P06909	1	1	34.15	23.3738	P06909|CFAH_MOUSE Complement factor H OS=Mus musculus GN=Cfh PE=1 SV=2	55558.5	1.29861e+06	49104.9	1.12739e+06	0	1
P08730	9	1	432.08	1.97655	P08730|K1C13_MOUSE Keratin, type I cytoskeletal 13 OS=Mus musculus GN=Krt13 PE=1 SV=2	30097.3	59488.7	26601.2	51645.2	1	0
P10107	1	1	27.05	0	P10107|ANXA1_MOUSE Annexin A1 OS=Mus musculus GN=Anxa1 PE=1 SV=2	40164.4	0	35498.9	0	1	0
P10630	1	1	45.17	0	P10630|IF4A2_MOUSE Eukaryotic initiation factor 4A-II OS=Mus musculus GN=Eif4a2 PE=1 SV=2	293270	0	259204	0	1	0
P12787	1	1	38.82	0.0431	P12787|COX5A_MOUSE Cytochrome c oxidase subunit 5A, mitochondrial OS=Mus musculus GN=Cox5a PE=1 SV=2	53972.1	2326.2	47702.7	2019.49	1	0
P14733	3	2	159.94	0.302281	P14733|LMNB1_MOUSE Lamin-B1 OS=Mus musculus GN=Lmnb1 PE=1 SV=3	116728	35284.5	103169	30632.3	1	0
P16675	1	1	32.66	0.495892	P16675|PPGB_MOUSE Lysosomal protective protein OS=Mus musculus GN=Ctsa PE=1 SV=1	248834	123395	219929	107125	1	0
P18242	1	1	87.5	15.2745	P18242|CATD_MOUSE Cathepsin D OS=Mus musculus GN=Ctsd PE=1 SV=1	91171.6	1.3926e+06	80581.1	1.20899e+06	0	1
P27048	1	1	35.41	0	P27048|RSMB_MOUSE Small nuclear ribonucleoprotein-associated protein B OS=Mus musculus GN=Snrpb PE=1 SV=1	28753.5	0	25413.5	0	1	0
P27661	2	1	105.29	0	P27661|H2AX_MOUSE Histone H2AX OS=Mus musculus GN=H2afx PE=1 SV=2	114235	0	100966	0	1	0
P28474	1	1	71.28	0.137992	P28474|ADHX_MOUSE Alcohol dehydrogenase class-3 OS=Mus musculus GN=Adh5 PE=1 SV=3	77594.8	10707.5	68581.4	9295.69	1	0
P30681	1	1	57.54	0	P30681|HMGB2_MOUSE High mobility group protein B2 OS=Mus musculus GN=Hmgb2 PE=1 SV=3	75257.1	0	66515.3	0	1	0
P33434	1	1	52.49	23.9435	P33434|MMP2_MOUSE 72 kDa type IV collagenase OS=Mus musculus GN=Mmp2 PE=1 SV=1	125571	3.0066e+06	110985	2.61018e+06	0	1
P34960	1	1	42.06	47.2169	P34960|MMP12_MOUSE Macrophage metalloelastase OS=Mus musculus GN=Mmp12 PE=1 SV=3	66308.4	3.13088e+06	58606.1	2.71808e+06	0	1
P35235	5	5	226.74	0.0183577	P35235|PTN11_MOUSE Tyrosine-protein phosphatase non-receptor type 11 OS=Mus musculus GN=Ptpn11 PE=1 SV=2	186754	3428.37	165060	2976.34	1	0
P35951	2	2	80.07	0.0951456	P35951|LDLR_MOUSE Low-density lipoprotein receptor OS=Mus musculus GN=Ldlr PE=1 SV=2	62636.8	5959.61	55360.9	5173.84	1	0
P37040	2	1	77.32	0	P37040|NCPR_MOUSE NADPH--cytochrome P450 reductase OS=Mus musculus GN=Por PE=1 SV=2	38087.6	0	33663.4	0	1	0
P45377	1	1	33.07	0.0880846	P45377|ALD2_MOUSE Aldose reductase-related protein 2 OS=Mus musculus GN=Akr1b8 PE=1 SV=2	143009	12596.9	126397	10936	1	0
P46638	1	1	50.73	0	P46638|RB11B_MOUSE Ras-related protein Rab-11B OS=Mus musculus GN=Rab11b PE=1 SV=3	167500	0	148043	0	1	0
P46737	2	2	67.38	0.0551336	P46737|BRCC3_MOUSE Lys-63-specific deubiquitinase BRCC36 OS=Mus musculus GN=Brcc3 PE=1 SV=1	109780	6052.58	97028.2	5254.55	1	0
P47753	2	1	118.74	0.0580382	P47753|CAZA1_MOUSE F-actin-capping protein subunit alpha-1 OS=Mus musculus GN=Capza1 PE=1 SV=4	154042	8940.35	136149	7761.57	1	0
P47757	2	2	98.7	0.112594	P47757|CAPZB_MOUSE F-actin-capping protein subunit beta OS=Mus musculus GN=Capzb PE=1 SV=3	311182	35037.1	275035	30417.5	1	0
P47791	2	2	72.82	0.0438315	P47791|GSHR_MOUSE Glutathione reductase, mitochondrial OS=Mus musculus GN=Gsr PE=1 SV=3	220712	9674.14	195074	8398.61	1	0
P47911	7	7	329.28	2.64324	P47911|RL6_MOUSE 60S ribosomal protein L6 OS=Mus musculus GN=Rpl6 PE=1 SV=3	338750	895396	299401	777338	0	1
P47955	1	1	39.39	0	P47955|RLA1_MOUSE 60S acidic ribosomal protein P1 OS=Mus musculus GN=Rplp1 PE=1 SV=1	420300	0	371478	0	1	0
P47962	3	3	117.4	1.59215	P47962|RL5_MOUSE 60S ribosomal protein L5 OS=Mus musculus GN=Rpl5 PE=1 SV=3	87638.1	139533	77458.1	121136	0	1
P49443	1	1	60.82	0.714107	P49443|PPM1A_MOUSE Protein phosphatase 1A OS=Mus musculus GN=Ppm1a PE=1 SV=1	395653	282538	349694	245286	1	0
P51150	1	1	31.25	0	P51150|RAB7A_MOUSE Ras-related protein Rab-7a OS=Mus musculus GN=Rab7a PE=1 SV=2	111437	0	98492.8	0	1	0
P53026	1	1	29.38	0.828868	P53026|RL10A_MOUSE 60S ribosomal protein L10a OS=Mus musculus GN=Rpl10a PE=1 SV=3	116135	96260.9	102645	83569	1	0
P53994	1	1	61.13	0	P53994|RAB2A_MOUSE Ras-related protein Rab-2A OS=Mus musculus GN=Rab2a PE=1 SV=1	58726.4	0	51904.8	0	1	0
P55065	2	2	95.44	3.24125	P55065|PLTP_MOUSE Phospholipid transfer protein OS=Mus musculus GN=Pltp PE=1 SV=1	297393	963926	262848	836833	0	1
P55264	1	1	61.99	0	P55264|ADK_MOUSE Adenosine kinase OS=Mus musculus GN=Adk PE=1 SV=2	88289.7	0	78034	0	1	0
P56959	2	2	92.06	0.00461367	P56959|FUS_MOUSE RNA-binding protein FUS OS=Mus musculus GN=Fus PE=1 SV=1	354991	1637.81	313755	1421.87	1	0
P58044	1	1	50.12	0	P58044|IDI1_MOUSE Isopentenyl-diphosphate Delta-isomerase 1 OS=Mus musculus GN=Idi1 PE=1 SV=1	38442.5	0	33977	0	1	0
P58321	1	1	30.1	0.134994	P58321|UCHL4_MOUSE Ubiquitin carboxyl-terminal hydrolase isozyme L4 OS=Mus musculus GN=Uchl4 PE=2 SV=1	573975	77483.1	507302	67267	1	0
P59999	1	1	35.09	0	P59999|ARPC4_MOUSE Actin-related protein 2/3 complex subunit 4 OS=Mus musculus GN=Arpc4 PE=1 SV=3	90417	0	79914.2	0	1	0
P60229	1	1	43.13	0	P60229|EIF3E_MOUSE Eukaryotic translation initiation factor 3 subunit E OS=Mus musculus GN=Eif3e PE=1 SV=1	196238	0	173443	0	1	0
P61082	1	1	31.78	0.0164325	P61082|UBC12_MOUSE NEDD8-conjugating enzyme Ubc12 OS=Mus musculus GN=Ube2m PE=1 SV=1	107700	1769.78	95189.3	1536.43	1	0
P61164	1	1	33.14	0.0444381	P61164|ACTZ_MOUSE Alpha-centractin OS=Mus musculus GN=Actr1a PE=1 SV=1	455616	20246.7	402692	17577.2	1	0
P61202	1	1	37.26	0	P61202|CSN2_MOUSE COP9 signalosome complex subunit 2 OS=Mus musculus GN=Cops2 PE=1 SV=1	6445.14	0	5696.47	0	1	0
P61255	3	3	115.74	2.48836	P61255|RL26_MOUSE 60S ribosomal protein L26 OS=Mus musculus GN=Rpl26 PE=1 SV=1	22069.5	54917.1	19506	47676.3	0	1
P61759	1	1	33.94	0.149869	P61759|PFD3_MOUSE Prefoldin subunit 3 OS=Mus musculus GN=Vbp1 PE=1 SV=2	178972	26822.3	158183	23285.8	1	0
P61971	1	1	31.39	0	P61971|NTF2_MOUSE Nuclear transport factor 2 OS=Mus musculus GN=Nutf2 PE=1 SV=1	470268	0	415642	0	1	0
P62137	1	1	51.41	0.243685	P62137|PP1A_MOUSE Serine/threonine-protein phosphatase PP1-alpha catalytic subunit OS=Mus musculus GN=Ppp1ca PE=1 SV=1	140906	34336.8	124539	29809.6	1	0
P62242	5	5	322.95	1.08012	P62242|RS8_MOUSE 40S ribosomal protein S8 OS=Mus musculus GN=Rps8 PE=1 SV=2	174744	188745	154445	163859	0	1
P62245	1	1	43.91	#DIV/0!	P62245|RS15A_MOUSE 40S ribosomal protein S15a OS=Mus musculus GN=Rps15a PE=1 SV=2	0	138311	0	120075	0	1
P62264	1	1	38.02	0.419243	P62264|RS14_MOUSE 40S ribosomal protein S14 OS=Mus musculus GN=Rps14 PE=1 SV=3	52310.7	21930.9	46234.3	19039.3	1	0
P62301	4	4	154.83	2.14679	P62301|RS13_MOUSE 40S ribosomal protein S13 OS=Mus musculus GN=Rps13 PE=1 SV=2	35117.4	75389.6	31038.2	65449.5	0	1
P62715	1	1	40.3	0	P62715|PP2AB_MOUSE Serine/threonine-protein phosphatase 2A catalytic subunit beta isoform OS=Mus musculus GN=Ppp2cb PE=1 SV=1	108357	0	95770.3	0	1	0
P62874;P62880	2	2	72.15	0.352455	P62874|GBB1_MOUSE Guanine nucleotide-binding protein G(I)/G(S)/G(T) subunit beta-1 OS=Mus musculus GN=Gnb1 PE=1 SV=3	303534	106982	268276	92876.5	1	0
P62889	1	1	54.92	0.604103	P62889|RL30_MOUSE 60S ribosomal protein L30 OS=Mus musculus GN=Rpl30 PE=1 SV=2	202741	122476	179190	106328	1	0
P62897	1	1	37.64	0.0368438	P62897|CYC_MOUSE Cytochrome c, somatic OS=Mus musculus GN=Cycs PE=1 SV=2	28158	1037.45	24887.2	900.663	1	0
P62918	3	3	137.55	63.1236	P62918|RL8_MOUSE 60S ribosomal protein L8 OS=Mus musculus GN=Rpl8 PE=1 SV=2	2384.38	150510	2107.41	130666	0	1
P63073	1	1	38.58	0.0549197	P63073|IF4E_MOUSE Eukaryotic translation initiation factor 4E OS=Mus musculus GN=Eif4e PE=1 SV=1	271282	14898.7	239770	12934.3	1	0
P63158	1	1	72.25	0.00764548	P63158|HMGB1_MOUSE High mobility group protein B1 OS=Mus musculus GN=Hmgb1 PE=1 SV=2	587192	4489.36	518984	3897.44	1	0
P63325	2	2	117.4	315.96	P63325|RS10_MOUSE 40S ribosomal protein S10 OS=Mus musculus GN=Rps10 PE=1 SV=1	6614.1	2.08979e+06	5845.81	1.81426e+06	0	1
P70275	1	1	53.5	21.3284	P70275|SEM3E_MOUSE Semaphorin-3E OS=Mus musculus GN=Sema3e PE=1 SV=3	4343.69	92643.8	3839.13	80428.7	0	1
P70335	1	1	38.49	0	P70335|ROCK1_MOUSE Rho-associated protein kinase 1 OS=Mus musculus GN=Rock1 PE=1 SV=1	68530.1	0	60569.7	0	1	0
P70349	1	1	40.95	0.232237	P70349|HINT1_MOUSE Histidine triad nucleotide-binding protein 1 OS=Mus musculus GN=Hint1 PE=1 SV=3	248251	57652.9	219414	50051.4	1	0
P70699	1	1	76.6	0.790324	P70699|LYAG_MOUSE Lysosomal alpha-glucosidase OS=Mus musculus GN=Gaa PE=1 SV=2	212030	167572	187401	145478	0	1
P83940	1	1	59.69	0	P83940|ELOC_MOUSE Transcription elongation factor B polypeptide 1 OS=Mus musculus GN=Tceb1 PE=1 SV=1	277231	0	245028	0	1	0
P84089	1	1	105.42	0	P84089|ERH_MOUSE Enhancer of rudimentary homolog OS=Mus musculus GN=Erh PE=1 SV=1	220761	0	195118	0	1	0
P97298	1	1	45.06	0.203122	P97298|PEDF_MOUSE Pigment epithelium-derived factor OS=Mus musculus GN=Serpinf1 PE=1 SV=2	124638	25316.8	110160	21978.8	1	0
P97379	1	1	66.33	0.177528	P97379|G3BP2_MOUSE Ras GTPase-activating protein-binding protein 2 OS=Mus musculus GN=G3bp2 PE=1 SV=2	247376	43916.1	218641	38125.8	1	0
P97467	2	2	84.69	0.265093	P97467|AMD_MOUSE Peptidyl-glycine alpha-amidating monooxygenase OS=Mus musculus GN=Pam PE=1 SV=2	381200	101054	336920	87729.8	1	0
Q2KN98	1	1	58.45	0.00228634	Q2KN98|CYTSA_MOUSE Cytospin-A OS=Mus musculus GN=Specc1l PE=1 SV=1	100451	229.665	88782.8	199.384	1	0
Q3TCN2	1	1	39.06	0	Q3TCN2|PLBL2_MOUSE Putative phospholipase B-like 2 OS=Mus musculus GN=Plbd2 PE=1 SV=2	47993.1	0	42418.2	0	1	0
Q3THS6	1	1	27.06	0.132814	Q3THS6|METK2_MOUSE S-adenosylmethionine synthase isoform type-2 OS=Mus musculus GN=Mat2a PE=1 SV=2	42152.1	5598.4	37255.8	4860.26	1	0
Q3TIX9	1	1	29.1	1.72085	Q3TIX9|SNUT2_MOUSE U4/U6.U5 tri-snRNP-associated protein 2 OS=Mus musculus GN=Usp39 PE=1 SV=2	20377	35065.7	18010	30442.3	0	1
Q3TVI8	1	1	47.29	2.47784	Q3TVI8|PBIP1_MOUSE Pre-B-cell leukemia transcription factor-interacting protein 1 OS=Mus musculus GN=Pbxip1 PE=1 SV=2	37651.6	93294.9	33278	80994	0	1
Q3TYX3	1	1	58.09	0.542372	Q3TYX3|SMYD5_MOUSE SET and MYND domain-containing protein 5 OS=Mus musculus GN=Smyd5 PE=1 SV=2	101397	54995.2	89619.2	47744.1	1	0
Q3U4H6	1	1	33.7	0.568076	Q3U4H6|HEXDC_MOUSE Hexosaminidase D OS=Mus musculus GN=Hexdc PE=1 SV=1	18334.8	10415.6	16205.1	9042.29	1	0
Q3UJK4	1	1	35.14	0	Q3UJK4|GTPB2_MOUSE GTP-binding protein 2 OS=Mus musculus GN=Gtpbp2 PE=1 SV=1	83225.8	0	73558.3	0	1	0
Q3UMW8	1	1	27.59	0	Q3UMW8|CLN5_MOUSE Ceroid-lipofuscinosis neuronal protein 5 homolog OS=Mus musculus GN=Cln5 PE=1 SV=1	35124.4	0	31044.3	0	1	0
Q3UV17	5	1	241.08	1.15312	Q3UV17|K22O_MOUSE Keratin, type II cytoskeletal 2 oral OS=Mus musculus GN=Krt76 PE=1 SV=1	2.39432e+06	2.76093e+06	2.1162e+06	2.3969e+06	1	0
Q5SUF2	3	3	197.76	37.6713	Q5SUF2|LC7L3_MOUSE Luc7-like protein 3 OS=Mus musculus GN=Luc7l3 PE=1 SV=1	17135.5	645516	15145.1	560405	0	1
Q5U405	1	1	36.13	1.12642	Q5U405|TMPSD_MOUSE Transmembrane protease serine 13 OS=Mus musculus GN=Tmprss13 PE=2 SV=2	541373	609815	478488	529411	0	1
Q6P1B1	1	1	28.04	0	Q6P1B1|XPP1_MOUSE Xaa-Pro aminopeptidase 1 OS=Mus musculus GN=Xpnpep1 PE=1 SV=1	73991.3	0	65396.5	0	1	0
Q6P2B1	1	1	51.09	0	Q6P2B1|TNPO3_MOUSE Transportin-3 OS=Mus musculus GN=Tnpo3 PE=1 SV=1	53040.2	0	46879.1	0	1	0
Q6P5H2	1	1	28.28	2.76361	Q6P5H2|NEST_MOUSE Nestin OS=Mus musculus GN=Nes PE=1 SV=1	3.17655e+06	8.77873e+06	2.80756e+06	7.62125e+06	1	0
Q6URW6	1	1	62.9	0.239234	Q6URW6|MYH14_MOUSE Myosin-14 OS=Mus musculus GN=Myh14 PE=1 SV=1	102915	24620.6	90960.1	21374.4	1	0
Q6ZWN5	2	2	82.41	3.73504	Q6ZWN5|RS9_MOUSE 40S ribosomal protein S9 OS=Mus musculus GN=Rps9 PE=1 SV=3	83656	312459	73938.6	271261	0	1
Q6ZWY6	1	1	33.94	0	Q6ZWY6|U2D2B_MOUSE Ubiquitin-conjugating enzyme E2 D2B OS=Mus musculus GN=Ube2d2b PE=1 SV=1	84179.2	0	74401	0	1	0
Q7TMK9	1	1	67.16	0.0704618	Q7TMK9|HNRPQ_MOUSE Heterogeneous nuclear ribonucleoprotein Q OS=Mus musculus GN=Syncrip PE=1 SV=2	110632	7795.3	97780.6	6767.49	1	0
Q7TMY8	3	3	139.04	0.036728	Q7TMY8|HUWE1_MOUSE E3 ubiquitin-protein ligase HUWE1 OS=Mus musculus GN=Huwe1 PE=1 SV=5	93529.1	3435.13	82664.8	2982.21	1	0
Q7TQI3	1	1	34.27	0	Q7TQI3|OTUB1_MOUSE Ubiquitin thioesterase OTUB1 OS=Mus musculus GN=Otub1 PE=1 SV=2	108054	0	95502.1	0	1	0
Q8BGV3	1	1	30.38	0	Q8BGV3|TACD2_MOUSE Tumor-associated calcium signal transducer 2 OS=Mus musculus GN=Tacstd2 PE=1 SV=1	271854	0	240275	0	1	0
Q8BH58	4	4	195.67	0.496746	Q8BH58|TIPRL_MOUSE TIP41-like protein OS=Mus musculus GN=Tiprl PE=1 SV=1	204115	101393	180405	88024.6	1	0
Q8BK64	1	1	42.31	0.0210615	Q8BK64|AHSA1_MOUSE Activator of 90 kDa heat shock protein ATPase homolog 1 OS=Mus musculus GN=Ahsa1 PE=1 SV=2	59244.8	1247.79	52363	1083.27	1	0
Q8BL80	1	1	46.62	7.68066	Q8BL80|RHG22_MOUSE Rho GTPase-activating protein 22 OS=Mus musculus GN=Arhgap22 PE=1 SV=2	2213.03	16997.5	1955.96	14756.4	0	1
Q8BLX7	1	1	27.93	0.0254768	Q8BLX7|COGA1_MOUSE Collagen alpha-1(XVI) chain OS=Mus musculus GN=Col16a1 PE=1 SV=2	83020.4	2115.09	73376.8	1836.22	1	0
Q8BMK4	1	1	31.47	0	Q8BMK4|CKAP4_MOUSE Cytoskeleton-associated protein 4 OS=Mus musculus GN=Ckap4 PE=1 SV=2	51221	0	45271.2	0	1	0
Q8BND5	1	1	38.11	0.842587	Q8BND5|QSOX1_MOUSE Sulfhydryl oxidase 1 OS=Mus musculus GN=Qsox1 PE=1 SV=1	234852	197883	207572	171793	1	0
Q8BPB5	1	1	47.98	0	Q8BPB5|FBLN3_MOUSE EGF-containing fibulin-like extracellular matrix protein 1 OS=Mus musculus GN=Efemp1 PE=1 SV=1	50909.9	0	44996.2	0	1	0
Q8BSS9	1	1	37.72	0.087164	Q8BSS9|LIPA2_MOUSE Liprin-alpha-2 OS=Mus musculus GN=Ppfia2 PE=1 SV=2	47096.9	4105.15	41626.1	3563.89	1	0
Q8BTY2	2	2	94.97	173.418	Q8BTY2|S4A7_MOUSE Sodium bicarbonate cotransporter 3 OS=Mus musculus GN=Slc4a7 PE=1 SV=2	5439.9	943376	4808	818992	0	1
Q8C1S0	1	1	44.93	16.0422	Q8C1S0|MED19_MOUSE Mediator of RNA polymerase II transcription subunit 19 OS=Mus musculus GN=Med19 PE=1 SV=1	53027.4	850673	46867.7	738512	0	1
Q8C6G8	1	1	50.87	0	Q8C6G8|WDR26_MOUSE WD repeat-containing protein 26 OS=Mus musculus GN=Wdr26 PE=1 SV=3	40475.1	0	35773.5	0	1	0
Q8CFD4	1	1	78.02	136.004	Q8CFD4|SNX8_MOUSE Sorting nexin-8 OS=Mus musculus GN=Snx8 PE=1 SV=1	1351.15	183762	1194.2	159533	0	1
Q8CFG9	1	1	90.7	1.38104	Q8CFG9|C1RB_MOUSE Complement C1r-B subcomponent OS=Mus musculus GN=C1rb PE=2 SV=1	89307.6	123337	78933.7	107075	1	0
Q8CGA0	1	1	44.4	0	Q8CGA0|PPM1F_MOUSE Protein phosphatase 1F OS=Mus musculus GN=Ppm1f PE=1 SV=1	192687	0	170305	0	1	0
Q8CIG9	1	1	34.77	0	Q8CIG9|FBXL8_MOUSE F-box/LRR-repeat protein 8 OS=Mus musculus GN=Fbxl8 PE=1 SV=1	93280.8	0	82445.3	0	1	0
Q8JZX4	1	1	31.03	#DIV/0!	Q8JZX4|SPF45_MOUSE Splicing factor 45 OS=Mus musculus GN=Rbm17 PE=1 SV=1	0	193979	0	168403	0	1
Q8K1Y2	1	1	26.4	0.00927462	Q8K1Y2|KPCD3_MOUSE Serine/threonine-protein kinase D3 OS=Mus musculus GN=Prkd3 PE=1 SV=1	429411	3982.63	379531	3457.52	1	0
Q8K2Q2	1	1	32.4	0	Q8K2Q2|GSTO2_MOUSE Glutathione S-transferase omega-2 OS=Mus musculus GN=Gsto2 PE=1 SV=1	51873.2	0	45847.6	0	1	0
Q8K3A9	1	1	72.51	1.03947	Q8K3A9|MEPCE_MOUSE 7SK snRNA methylphosphate capping enzyme OS=Mus musculus GN=Mepce PE=1 SV=2	374970	389769	331414	338378	0	1
Q8K4Z5	5	5	214.22	0.268988	Q8K4Z5|SF3A1_MOUSE Splicing factor 3A subunit 1 OS=Mus musculus GN=Sf3a1 PE=1 SV=1	482968	129912	426866	112783	1	0
Q8K5B2	1	1	32.94	0.010309	Q8K5B2|MCFD2_MOUSE Multiple coagulation factor deficiency protein 2 homolog OS=Mus musculus GN=Mcfd2 PE=1 SV=1	1.91754e+06	19768	1.6948e+06	17161.6	1	0
Q8K479	1	1	50.2	0.618979	Q8K479|C1QT5_MOUSE Complement C1q tumor necrosis factor-related protein 5 OS=Mus musculus GN=C1qtnf5 PE=1 SV=1	291656	180529	257777	156726	1	0
Q8QZR4	1	1	39.28	1.06944	Q8QZR4|OAF_MOUSE Out at first protein homolog OS=Mus musculus GN=Oaf PE=2 SV=1	626679	670194	553884	581829	1	0
Q8R0W0	3	1	148.17	0	Q8R0W0|EPIPL_MOUSE Epiplakin OS=Mus musculus GN=Eppk1 PE=1 SV=2	27361.1	0	24182.8	0	1	0
Q8R1B4	2	2	88.76	0.0946365	Q8R1B4|EIF3C_MOUSE Eukaryotic translation initiation factor 3 subunit C OS=Mus musculus GN=Eif3c PE=1 SV=1	278642	26369.7	246275	22892.9	1	0
Q8R3R8	1	1	32.45	0.0532571	Q8R3R8|GBRL1_MOUSE Gamma-aminobutyric acid receptor-associated protein-like 1 OS=Mus musculus GN=Gabarapl1 PE=1 SV=2	171048	9109.5	151179	7908.41	1	0
Q8R016	1	1	40.43	0.0386276	Q8R016|BLMH_MOUSE Bleomycin hydrolase OS=Mus musculus GN=Blmh PE=1 SV=1	71233.3	2751.58	62958.9	2388.78	1	0
Q8R180	2	2	91	12.6182	Q8R180|ERO1A_MOUSE ERO1-like protein alpha OS=Mus musculus GN=Ero1a PE=1 SV=2	392571	4.95355e+06	346970	4.30043e+06	1	0
Q8R326	3	2	121.27	12.3156	Q8R326|PSPC1_MOUSE Paraspeckle component 1 OS=Mus musculus GN=Pspc1 PE=1 SV=1	5351.79	65910.5	4730.13	57220.2	0	1
Q8R516	1	1	35.23	0	Q8R516|MIB2_MOUSE E3 ubiquitin-protein ligase MIB2 OS=Mus musculus GN=Mib2 PE=1 SV=2	370229	0	327224	0	1	0
Q8VC97	1	1	40.23	0	Q8VC97|BUP1_MOUSE Beta-ureidopropionase OS=Mus musculus GN=Upb1 PE=1 SV=1	30815.1	0	27235.6	0	1	0
Q8VCT3	1	1	32.06	0.0300153	Q8VCT3|AMPB_MOUSE Aminopeptidase B OS=Mus musculus GN=Rnpep PE=1 SV=2	57128.3	1714.72	50492.3	1488.64	1	0
Q8VDL4	1	1	34.89	0.522241	Q8VDL4|ADPGK_MOUSE ADP-dependent glucokinase OS=Mus musculus GN=Adpgk PE=1 SV=2	50676.2	26465.2	44789.7	22975.8	1	0
Q8VHX6	7	1	332.51	0.0521581	Q8VHX6|FLNC_MOUSE Filamin-C OS=Mus musculus GN=Flnc PE=1 SV=3	41194.4	2148.62	36409.3	1865.33	1	0
Q8VI75	2	2	80.6	0.00992008	Q8VI75|IPO4_MOUSE Importin-4 OS=Mus musculus GN=Ipo4 PE=1 SV=1	34002.3	337.306	30052.6	292.832	1	0
Q9CQ71	1	1	60.5	0.0154258	Q9CQ71|RFA3_MOUSE Replication protein A 14 kDa subunit OS=Mus musculus GN=Rpa3 PE=1 SV=1	83859.6	1293.6	74118.5	1123.04	1	0
Q9CQE6	1	1	75.85	0.0511625	Q9CQE6|ASF1A_MOUSE Histone chaperone ASF1A OS=Mus musculus GN=Asf1a PE=1 SV=1	289519	14812.5	255888	12859.5	1	0
Q9CQE8	1	1	77.14	0	Q9CQE8|CN166_MOUSE UPF0568 protein C14orf166 homolog OS=Mus musculus PE=1 SV=1	96193.6	0	85019.8	0	1	0
Q9CR26	1	1	61.98	0.00139853	Q9CR26|VTA1_MOUSE Vacuolar protein sorting-associated protein VTA1 homolog OS=Mus musculus GN=Vta1 PE=1 SV=1	32062.4	44.8402	28338.1	38.9281	1	0
Q9CXF7	3	1	115.75	0	Q9CXF7|CHD1L_MOUSE Chromodomain-helicase-DNA-binding protein 1-like OS=Mus musculus GN=Chd1l PE=1 SV=1	22425.5	0	19820.6	0	1	0
Q9CXG3	3	3	146.59	9.08046	Q9CXG3|PPIL4_MOUSE Peptidyl-prolyl cis-trans isomerase-like 4 OS=Mus musculus GN=Ppil4 PE=1 SV=2	159712	1.45026e+06	141160	1.25904e+06	0	1
Q9CY64	1	1	52.82	0	Q9CY64|BIEA_MOUSE Biliverdin reductase A OS=Mus musculus GN=Blvra PE=1 SV=1	82366.3	0	72798.7	0	1	0
Q9CY66	1	1	31.41	7.33985	Q9CY66|GAR1_MOUSE H/ACA ribonucleoprotein complex subunit 1 OS=Mus musculus GN=Gar1 PE=1 SV=1	9810.04	72004.3	8670.51	62510.6	0	1
Q9CZP7	1	1	39.77	0	Q9CZP7|CD37L_MOUSE Hsp90 co-chaperone Cdc37-like 1 OS=Mus musculus GN=Cdc37l1 PE=1 SV=1	50281.8	0	44441.1	0	1	0
Q9CZT5	1	1	39.5	0	Q9CZT5|VASN_MOUSE Vasorin OS=Mus musculus GN=Vasn PE=2 SV=2	63276.7	0	55926.6	0	1	0
Q9CZY3	1	1	39.37	0.00644212	Q9CZY3|UB2V1_MOUSE Ubiquitin-conjugating enzyme E2 variant 1 OS=Mus musculus GN=Ube2v1 PE=1 SV=1	384632	2477.85	339954	2151.14	1	0
Q9D0R2	1	1	50.18	0	Q9D0R2|SYTC_MOUSE Threonine--tRNA ligase, cytoplasmic OS=Mus musculus GN=Tars PE=1 SV=2	57494.9	0	50816.3	0	1	0
Q9D0R8	1	1	49.94	0.471666	Q9D0R8|LSM12_MOUSE Protein LSM12 homolog OS=Mus musculus GN=Lsm12 PE=1 SV=1	99147.2	46764.4	87630.3	40598.5	1	0
Q9D4D4	2	1	126.58	0.0643431	Q9D4D4|TKTL2_MOUSE Transketolase-like protein 2 OS=Mus musculus GN=Tktl2 PE=1 SV=1	3.24743e+06	208950	2.87021e+06	181400	1	0
Q9D6K8	1	1	72.81	0.450637	Q9D6K8|FUND2_MOUSE FUN14 domain-containing protein 2 OS=Mus musculus GN=Fundc2 PE=1 SV=1	89068.9	40137.7	78722.7	34845.6	1	0
Q9D6P8	2	2	85.73	0.053694	Q9D6P8|CALL3_MOUSE Calmodulin-like protein 3 OS=Mus musculus GN=Calml3 PE=2 SV=1	379999	20403.7	335859	17713.5	1	0
Q9D554	4	4	286.94	0.284328	Q9D554|SF3A3_MOUSE Splicing factor 3A subunit 3 OS=Mus musculus GN=Sf3a3 PE=1 SV=2	89986.3	25585.7	79533.6	22212.2	1	0
Q9D883	2	2	102.34	2.99805	Q9D883|U2AF1_MOUSE Splicing factor U2AF 35 kDa subunit OS=Mus musculus GN=U2af1 PE=1 SV=4	105607	316617	93340.1	274871	1	0
Q9DB05	1	1	56.37	0.0265738	Q9DB05|SNAA_MOUSE Alpha-soluble NSF attachment protein OS=Mus musculus GN=Napa PE=1 SV=1	46495	1235.55	41094.1	1072.64	1	0
Q9DBF7	1	1	28.67	21.0024	Q9DBF7|CWC25_MOUSE Pre-mRNA-splicing factor CWC25 homolog OS=Mus musculus GN=Cwc25 PE=2 SV=2	7086.8	148840	6263.6	129215	0	1
Q9DCL9	1	1	40.21	0.0525074	Q9DCL9|PUR6_MOUSE Multifunctional protein ADE2 OS=Mus musculus GN=Paics PE=1 SV=4	378497	19873.9	334531	17253.5	1	0
Q9EP71	2	2	80.84	0	Q9EP71|RAI14_MOUSE Ankycorbin OS=Mus musculus GN=Rai14 PE=1 SV=1	171872	0	151907	0	1	0
Q9EPK6	1	1	32.45	0	Q9EPK6|SIL1_MOUSE Nucleotide exchange factor SIL1 OS=Mus musculus GN=Sil1 PE=1 SV=2	33804.2	0	29877.5	0	1	0
Q9EQU5	1	1	77.01	0.814873	Q9EQU5|SET_MOUSE Protein SET OS=Mus musculus GN=Set PE=1 SV=1	127594	103973	112773	90263.9	1	0
Q9ER10	1	1	41.87	0.00392177	Q9ER10|BSSP4_MOUSE Brain-specific serine protease 4 OS=Mus musculus GN=Prss22 PE=2 SV=1	178374	699.541	157654	607.307	1	0
Q9ERR7	1	1	46.01	0.260875	Q9ERR7|SEP15_MOUSE 15 kDa selenoprotein OS=Mus musculus GN=Sep15 PE=1 SV=3	154845	40395.2	136858	35069.1	1	0
Q9ES28;Q8K4I3	2	2	76.24	0.104341	Q9ES28|ARHG7_MOUSE Rho guanine nucleotide exchange factor 7 OS=Mus musculus GN=Arhgef7 PE=1 SV=2	64541.9	6734.37	57044.8	5846.44	1	0
Q9ESP1	2	2	111.14	0.235177	Q9ESP1|SDF2L_MOUSE Stromal cell-derived factor 2-like protein 1 OS=Mus musculus GN=Sdf2l1 PE=1 SV=2	1.24012e+06	291647	1.09606e+06	253193	1	0
Q9JKB1	1	1	95	0.227746	Q9JKB1|UCHL3_MOUSE Ubiquitin carboxyl-terminal hydrolase isozyme L3 OS=Mus musculus GN=Uchl3 PE=1 SV=2	797495	181627	704859	157679	1	0
Q9JKR6	1	1	63.31	0.27785	Q9JKR6|HYOU1_MOUSE Hypoxia up-regulated protein 1 OS=Mus musculus GN=Hyou1 PE=1 SV=1	198936	55274.4	175828	47986.5	1	0
Q9JLI8	1	1	44.14	0	Q9JLI8|SART3_MOUSE Squamous cell carcinoma antigen recognized by T-cells 3 OS=Mus musculus GN=Sart3 PE=1 SV=1	46976.5	0	41519.7	0	1	0
Q9JMD0	1	1	53.58	0.144875	Q9JMD0|ZN207_MOUSE BUB3-interacting and GLEBS motif-containing protein ZNF207 OS=Mus musculus GN=Znf207 PE=1 SV=1	175038	25358.6	154706	22015.1	1	0
Q9QXE7	4	1	236.73	0.0734346	Q9QXE7|TBL1X_MOUSE F-box-like/WD repeat-containing protein TBL1X OS=Mus musculus GN=Tbl1x PE=1 SV=2	168524	12375.5	148949	10743.8	1	0
Q9QYJ0	1	1	53.83	0.0606124	Q9QYJ0|DNJA2_MOUSE DnaJ homolog subfamily A member 2 OS=Mus musculus GN=Dnaja2 PE=1 SV=1	62220.7	3771.34	54993.2	3274.09	1	0
Q9QZQ8	1	1	39.32	0.0763002	Q9QZQ8|H2AY_MOUSE Core histone macro-H2A.1 OS=Mus musculus GN=H2afy PE=1 SV=3	40672	3103.28	35947.5	2694.11	1	0
Q9R0P4	1	1	188.41	11.3909	Q9R0P4|SMAP_MOUSE Small acidic protein OS=Mus musculus GN=Smap PE=1 SV=1	2259.24	25734.6	1996.8	22341.5	0	1
Q9R1V6	1	1	48.49	3.97865	Q9R1V6|ADA22_MOUSE Disintegrin and metalloproteinase domain-containing protein 22 OS=Mus musculus GN=Adam22 PE=1 SV=2	64991.7	258579	57442.3	224486	0	1
Q9R194	1	1	36.52	0.304096	Q9R194|CRY2_MOUSE Cryptochrome-2 OS=Mus musculus GN=Cry2 PE=1 SV=1	34629.4	10530.6	30606.8	9142.18	1	0
Q9WTM5	1	1	32.08	0.0669831	Q9WTM5|RUVB2_MOUSE RuvB-like 2 OS=Mus musculus GN=Ruvbl2 PE=1 SV=3	308295	20650.5	272483	17927.8	1	0
Q9WTX5	1	1	42.29	1.14721	Q9WTX5|SKP1_MOUSE S-phase kinase-associated protein 1 OS=Mus musculus GN=Skp1 PE=1 SV=3	52298.8	59997.9	46223.8	52087.2	1	0
Q9WTX6	1	1	27.51	0	Q9WTX6|CUL1_MOUSE Cullin-1 OS=Mus musculus GN=Cul1 PE=1 SV=1	31738.9	0	28052.1	0	1	0
Q9WV91	1	1	69.06	0.0225886	Q9WV91|FPRP_MOUSE Prostaglandin F2 receptor negative regulator OS=Mus musculus GN=Ptgfrn PE=1 SV=2	106102	2396.7	93777.3	2080.7	1	0
Q9WVA3	1	1	37.87	0	Q9WVA3|BUB3_MOUSE Mitotic checkpoint protein BUB3 OS=Mus musculus GN=Bub3 PE=1 SV=2	27472.7	0	24281.5	0	1	0
Q9Z2K1	8	1	480.72	0.464799	Q9Z2K1|K1C16_MOUSE Keratin, type I cytoskeletal 16 OS=Mus musculus GN=Krt16 PE=1 SV=3	8742.41	4063.46	7726.89	3527.69	1	0
Q9Z2Y3	1	1	46.93	0	Q9Z2Y3|HOME1_MOUSE Homer protein homolog 1 OS=Mus musculus GN=Homer1 PE=1 SV=2	42226	0	37321.1	0	1	0
Q9Z130	3	1	149.09	0.0770042	Q9Z130|HNRDL_MOUSE Heterogeneous nuclear ribonucleoprotein D-like OS=Mus musculus GN=Hnrnpdl PE=1 SV=1	165601	12752	146365	11070.7	1	0
Q80TZ9	1	1	58.2	0	Q80TZ9|RERE_MOUSE Arginine-glutamic acid dipeptide repeats protein OS=Mus musculus GN=Rere PE=1 SV=3	400359	0	353854	0	1	0
Q80UG5	2	2	76.97	1.00739	Q80UG5|SEPT9_MOUSE Septin-9 OS=Mus musculus GN=Sept9 PE=1 SV=1	65564	66048.8	57948.1	57340.3	1	0
Q80W00	2	2	104.77	#DIV/0!	Q80W00|PP1RA_MOUSE Serine/threonine-protein phosphatase 1 regulatory subunit 10 OS=Mus musculus GN=Ppp1r10 PE=1 SV=1	0	179587	0	155909	0	1
Q80WS3	1	1	30.66	17.9752	Q80WS3|FBLL1_MOUSE rRNA/tRNA 2'-O-methyltransferase fibrillarin-like protein 1 OS=Mus musculus GN=Fbll1 PE=1 SV=1	4418.98	79432.1	3905.67	68959	0	1
Q91V64	1	1	65.47	0.124429	Q91V64|ISOC1_MOUSE Isochorismatase domain-containing protein 1 OS=Mus musculus GN=Isoc1 PE=1 SV=1	71721	8924.16	63389.9	7747.52	1	0
Q91VR5	1	1	75.37	1.05021	Q91VR5|DDX1_MOUSE ATP-dependent RNA helicase DDX1 OS=Mus musculus GN=Ddx1 PE=1 SV=1	47453.2	49835.8	41941.1	43265	1	0
Q91W97	1	1	26.96	0	Q91W97|HKDC1_MOUSE Putative hexokinase HKDC1 OS=Mus musculus GN=Hkdc1 PE=2 SV=1	36965.6	0	32671.7	0	1	0
Q91Y44	1	1	73.74	1.76515	Q91Y44|BRDT_MOUSE Bromodomain testis-specific protein OS=Mus musculus GN=Brdt PE=1 SV=3	256312	452428	226539	392776	1	0
Q91YU8	2	1	71.41	16.6939	Q91YU8|SSF1_MOUSE Suppressor of SWI4 1 homolog OS=Mus musculus GN=Ppan PE=1 SV=2	3090.9	51599.1	2731.87	44795.8	0	1
Q99J45	1	1	47.1	0	Q99J45|NRBP_MOUSE Nuclear receptor-binding protein OS=Mus musculus GN=Nrbp1 PE=1 SV=1	47254	0	41765	0	1	0
Q99J77	1	1	107.83	0.00588613	Q99J77|SIAS_MOUSE Sialic acid synthase OS=Mus musculus GN=Nans PE=1 SV=1	640369	3769.29	565984	3272.32	1	0
Q99JW4	1	1	48.23	1.09124	Q99JW4|LIMS1_MOUSE LIM and senescent cell antigen-like-containing domain protein 1 OS=Mus musculus GN=Lims1 PE=1 SV=3	25528.8	27857.9	22563.4	24184.9	1	0
Q99JX3	1	1	72.51	0	Q99JX3|GORS2_MOUSE Golgi reassembly-stacking protein 2 OS=Mus musculus GN=Gorasp2 PE=1 SV=3	16743.3	0	14798.4	0	1	0
Q99K41	3	3	126.72	1.81795	Q99K41|EMIL1_MOUSE EMILIN-1 OS=Mus musculus GN=Emilin1 PE=1 SV=1	83582.5	151949	73873.6	131914	0	1
Q99K70	1	1	43.06	0	Q99K70|RRAGC_MOUSE Ras-related GTP-binding protein C OS=Mus musculus GN=Rragc PE=1 SV=1	41437	0	36623.7	0	1	0
Q99KK9	1	1	55.54	0	Q99KK9|SYHM_MOUSE Probable histidine--tRNA ligase, mitochondrial OS=Mus musculus GN=Hars2 PE=1 SV=1	47722.2	0	42178.9	0	1	0
Q99KN2	1	1	37.34	0.0655163	Q99KN2|CIAO1_MOUSE Probable cytosolic iron-sulfur protein assembly protein CIAO1 OS=Mus musculus GN=Ciao1 PE=1 SV=1	260705	17080.4	230421	14828.4	1	0
Q99KP6	1	1	31.29	0.131556	Q99KP6|PRP19_MOUSE Pre-mRNA-processing factor 19 OS=Mus musculus GN=Prpf19 PE=1 SV=1	73767.3	9704.53	65198.5	8424.99	1	0
Q99LD4	1	1	37.82	0	Q99LD4|CSN1_MOUSE COP9 signalosome complex subunit 1 OS=Mus musculus GN=Gps1 PE=1 SV=1	21166.2	0	18707.5	0	1	0
Q99LJ1	1	1	57.39	3.91251	Q99LJ1|FUCO_MOUSE Tissue alpha-L-fucosidase OS=Mus musculus GN=Fuca1 PE=1 SV=1	361155	1.41302e+06	319203	1.22671e+06	0	1
Q99M28	2	2	97.68	121.182	Q99M28|RNPS1_MOUSE RNA-binding protein with serine-rich domain 1 OS=Mus musculus GN=Rnps1 PE=1 SV=1	2182.88	264526	1929.31	229648	0	1
Q99NB9	4	4	184.7	7.8851	Q99NB9|SF3B1_MOUSE Splicing factor 3B subunit 1 OS=Mus musculus GN=Sf3b1 PE=1 SV=1	28398.2	223923	25099.5	194399	0	1
Q00519	1	1	57.36	0	Q00519|XDH_MOUSE Xanthine dehydrogenase/oxidase OS=Mus musculus GN=Xdh PE=1 SV=5	19353.6	0	17105.5	0	1	0
Q811D0	1	1	35.47	0	Q811D0|DLG1_MOUSE Disks large homolog 1 OS=Mus musculus GN=Dlg1 PE=1 SV=1	70374.4	0	62199.8	0	1	0
Q921V5	1	1	56.69	1.26519	Q921V5|MGAT2_MOUSE Alpha-1,6-mannosyl-glycoprotein 2-beta-N-acetylglucosaminyltransferase OS=Mus musculus GN=Mgat2 PE=1 SV=1	181956	230210	160820	199857	1	0
Q922H1	1	1	57.7	0.125273	Q922H1|ANM3_MOUSE Protein arginine N-methyltransferase 3 OS=Mus musculus GN=Prmt3 PE=1 SV=2	68804.9	8619.38	60812.5	7482.91	1	0
Q923B1	1	1	27.05	15.0327	Q923B1|DBR1_MOUSE Lariat debranching enzyme OS=Mus musculus GN=Dbr1 PE=1 SV=2	1743.34	26207.2	1540.84	22751.8	0	1
Q00993	1	1	45.03	0	Q00993|UFO_MOUSE Tyrosine-protein kinase receptor UFO OS=Mus musculus GN=Axl PE=1 SV=2	140560	0	124233	0	1	0
Q03145	1	1	33.71	0	Q03145|EPHA2_MOUSE Ephrin type-A receptor 2 OS=Mus musculus GN=Epha2 PE=1 SV=3	6906.59	0	6104.32	0	1	0
Q05895	1	1	49.02	75.2515	Q05895|TSP3_MOUSE Thrombospondin-3 OS=Mus musculus GN=Thbs3 PE=1 SV=2	821.551	61822.9	726.12	53671.6	0	1
Q07797	1	1	66.85	3.58694	Q07797|LG3BP_MOUSE Galectin-3-binding protein OS=Mus musculus GN=Lgals3bp PE=1 SV=1	278231	997999	245912	866413	1	0
Q08122	2	2	78.56	0.0156066	Q08122|TLE3_MOUSE Transducin-like enhancer protein 3 OS=Mus musculus GN=Tle3 PE=1 SV=3	165019	2575.38	145850	2235.82	1	0
Q60520	6	5	410.83	0.664865	Q60520|SIN3A_MOUSE Paired amphipathic helix protein Sin3a OS=Mus musculus GN=Sin3a PE=1 SV=3	776464	516244	686270	448177	1	0
Q60817	1	1	63.21	0	Q60817|NACA_MOUSE Nascent polypeptide-associated complex subunit alpha OS=Mus musculus GN=Naca PE=1 SV=1	178607	0	157860	0	1	0
Q60902	1	1	37.92	0.0365431	Q60902|EP15R_MOUSE Epidermal growth factor receptor substrate 15-like 1 OS=Mus musculus GN=Eps15l1 PE=1 SV=3	6285.33	229.685	5555.23	199.402	1	0
Q60972	7	3	305.67	0.135042	Q60972|RBBP4_MOUSE Histone-binding protein RBBP4 OS=Mus musculus GN=Rbbp4 PE=1 SV=5	1.16172e+06	156881	1.02678e+06	136197	1	0
Q61074	1	1	31.19	0	Q61074|PPM1G_MOUSE Protein phosphatase 1G OS=Mus musculus GN=Ppm1g PE=1 SV=3	67629.5	0	59773.7	0	1	0
Q61081	1	1	47.47	0.137913	Q61081|CDC37_MOUSE Hsp90 co-chaperone Cdc37 OS=Mus musculus GN=Cdc37 PE=1 SV=1	279896	38601.2	247384	33511.6	1	0
Q61576	1	1	81.34	0	Q61576|FKB10_MOUSE Peptidyl-prolyl cis-trans isomerase FKBP10 OS=Mus musculus GN=Fkbp10 PE=1 SV=2	111563	0	98604.2	0	1	0
Q61624	1	1	86.9	6.17321	Q61624|ZN148_MOUSE Zinc finger protein 148 OS=Mus musculus GN=Znf148 PE=1 SV=2	42725.9	263756	37762.9	228980	0	1
Q61699	1	1	56.98	0	Q61699|HS105_MOUSE Heat shock protein 105 kDa OS=Mus musculus GN=Hsph1 PE=1 SV=2	84817.6	0	74965.2	0	1	0
Q61990;P57722	4	1	197.51	0.0874786	Q61990|PCBP2_MOUSE Poly(rC)-binding protein 2 OS=Mus musculus GN=Pcbp2 PE=1 SV=1	193311	16910.6	170856	14680.9	1	0
Q62165	2	2	76.83	0.201099	Q62165|DAG1_MOUSE Dystroglycan OS=Mus musculus GN=Dag1 PE=1 SV=4	62533.5	12575.4	55269.7	10917.4	1	0
Q62193	1	1	30.89	0.116926	Q62193|RFA2_MOUSE Replication protein A 32 kDa subunit OS=Mus musculus GN=Rpa2 PE=1 SV=1	75420.5	8818.63	66659.7	7655.89	1	0
Q62203	3	3	153.54	0.080725	Q62203|SF3A2_MOUSE Splicing factor 3A subunit 2 OS=Mus musculus GN=Sf3a2 PE=1 SV=2	939917	75874.7	830736	65870.7	1	0
Q62318	1	1	42.59	1.28431	Q62318|TIF1B_MOUSE Transcription intermediary factor 1-beta OS=Mus musculus GN=Trim28 PE=1 SV=3	77079.9	98994.3	68126.3	85941.9	1	0
Q62356	2	2	69.86	0.287629	Q62356|FSTL1_MOUSE Follistatin-related protein 1 OS=Mus musculus GN=Fstl1 PE=1 SV=2	176792	50850.5	156256	44145.9	0	1
Q63810	1	1	30.33	0.125144	Q63810|CANB1_MOUSE Calcineurin subunit B type 1 OS=Mus musculus GN=Ppp3r1 PE=1 SV=3	19813.9	2479.58	17512.3	2152.65	1	0
Q64442	1	1	40.44	0.0413583	Q64442|DHSO_MOUSE Sorbitol dehydrogenase OS=Mus musculus GN=Sord PE=1 SV=3	215370	8907.36	190353	7732.92	1	0
B2RXS4	2	2	81.92	0.0412723	B2RXS4|PLXB2_MOUSE Plexin-B2 OS=Mus musculus GN=Plxnb2 PE=1 SV=1	443048	18285.6	391584	15874.7	2	0
O08709	2	2	92.56	0.0123257	O08709|PRDX6_MOUSE Peroxiredoxin-6 OS=Mus musculus GN=Prdx6 PE=1 SV=3	198647	2448.47	175573	2125.64	2	0
O35737;P70333	5	4	312.53	0.102929	O35737|HNRH1_MOUSE Heterogeneous nuclear ribonucleoprotein H OS=Mus musculus GN=Hnrnph1 PE=1 SV=3	720716	74182.3	636998	64401.4	2	0
O55029	2	2	85.06	0.280519	O55029|COPB2_MOUSE Coatomer subunit beta' OS=Mus musculus GN=Copb2 PE=1 SV=2	239752	67254.9	211902	58387.4	2	0
O70400	5	5	279.11	1.23899	O70400|PDLI1_MOUSE PDZ and LIM domain protein 1 OS=Mus musculus GN=Pdlim1 PE=1 SV=4	6.42596e+07	7.96168e+07	5.67952e+07	6.91194e+07	2	0
O70589	2	2	78.36	0.0689794	O70589|CSKP_MOUSE Peripheral plasma membrane protein CASK OS=Mus musculus GN=Cask PE=1 SV=2	39191.7	2703.42	34639.2	2346.97	2	0
O88569	4	2	247.42	0.32376	O88569|ROA2_MOUSE Heterogeneous nuclear ribonucleoproteins A2/B1 OS=Mus musculus GN=Hnrnpa2b1 PE=1 SV=2	1.16948e+06	378632	1.03364e+06	328710	2	0
O89079	2	2	132.72	0.00574396	O89079|COPE_MOUSE Coatomer subunit epsilon OS=Mus musculus GN=Cope PE=1 SV=3	761979	4376.77	673468	3799.7	2	0
P0C0S6	2	1	113.61	4.64333	P0C0S6|H2AZ_MOUSE Histone H2A.Z OS=Mus musculus GN=H2afz PE=1 SV=2	354475	1.64595e+06	313299	1.42893e+06	1	1
P09528	1	1	55.41	0.105372	P09528|FRIH_MOUSE Ferritin heavy chain OS=Mus musculus GN=Fth1 PE=1 SV=2	391023	41202.7	345602	35770.2	1	1
P10518	2	2	130	0.0993842	P10518|HEM2_MOUSE Delta-aminolevulinic acid dehydratase OS=Mus musculus GN=Alad PE=1 SV=1	219998	21864.3	194443	18981.5	2	0
P10639	1	1	57.65	0.135117	P10639|THIO_MOUSE Thioredoxin OS=Mus musculus GN=Txn PE=1 SV=3	1.53106e+06	206872	1.35321e+06	179596	1	1
P15626;P10649;O35660;P48774	4	2	240.08	0.00707296	P15626|GSTM2_MOUSE Glutathione S-transferase Mu 2 OS=Mus musculus GN=Gstm2 PE=1 SV=2	738118	5220.68	652379	4532.34	2	0
P19096	2	2	86.64	0.17312	P19096|FAS_MOUSE Fatty acid synthase OS=Mus musculus GN=Fasn PE=1 SV=2	209947	36346	185560	31553.8	2	0
P25785	2	2	149.83	299.82	P25785|TIMP2_MOUSE Metalloproteinase inhibitor 2 OS=Mus musculus GN=Timp2 PE=1 SV=2	11419.4	3.42376e+06	10092.9	2.97234e+06	0	2
P27659	5	5	248.33	2.63517	P27659|RL3_MOUSE 60S ribosomal protein L3 OS=Mus musculus GN=Rpl3 PE=1 SV=3	104631	275719	92476.7	239366	1	1
P31254	2	1	96.86	0.15143	P31254|UBA1Y_MOUSE Ubiquitin-like modifier-activating enzyme 1 Y OS=Mus musculus GN=Uba1y PE=1 SV=2	593705	89904.6	524741	78050.7	1	1
P34022	2	1	89.33	0.418509	P34022|RANG_MOUSE Ran-specific GTPase-activating protein OS=Mus musculus GN=Ranbp1 PE=1 SV=2	627883	262775	554949	228128	1	1
P35979	1	1	86.98	0.0631527	P35979|RL12_MOUSE 60S ribosomal protein L12 OS=Mus musculus GN=Rpl12 PE=1 SV=2	980105	61896.2	866256	53735.2	1	1
P35980	5	5	265.67	5.97082	P35980|RL18_MOUSE 60S ribosomal protein L18 OS=Mus musculus GN=Rpl18 PE=1 SV=3	134922	805598	119250	699380	0	2
P36552	2	2	71.86	0	P36552|HEM6_MOUSE Oxygen-dependent coproporphyrinogen-III oxidase, mitochondrial OS=Mus musculus GN=Cpox PE=1 SV=2	78000.6	0	68940.1	0	2	0
P40336	2	2	93.01	0.137414	P40336|VP26A_MOUSE Vacuolar protein sorting-associated protein 26A OS=Mus musculus GN=Vps26a PE=1 SV=1	439446	60386.1	388400	52424.3	2	0
P48036	2	2	140.32	0.00451109	P48036|ANXA5_MOUSE Annexin A5 OS=Mus musculus GN=Anxa5 PE=1 SV=1	420747	1898.03	371873	1647.77	2	0
P50446;Q9Z331;P07744;P11679;P19246;Q99M73	10	2	582.2	1.13664	P50446|K2C6A_MOUSE Keratin, type II cytoskeletal 6A OS=Mus musculus GN=Krt6a PE=1 SV=3	835543	949713	738487	824493	1	1
P50543	2	2	106.93	0.530161	P50543|S10AB_MOUSE Protein S100-A11 OS=Mus musculus GN=S100a11 PE=1 SV=1	300471	159298	265569	138295	2	0
P54751	2	2	74.3	36.7741	P54751|SIA4A_MOUSE CMP-N-acetylneuraminate-beta-galactosamide-alpha-2,3-sialyltransferase 1 OS=Mus musculus GN=St3gal1 PE=2 SV=1	18674	686718	16504.8	596174	0	2
P54823	2	2	70.82	6.02796	P54823|DDX6_MOUSE Probable ATP-dependent RNA helicase DDX6 OS=Mus musculus GN=Ddx6 PE=1 SV=1	8014.76	48312.7	7083.77	41942.7	0	2
P60335	7	4	355.57	0.153782	P60335|PCBP1_MOUSE Poly(rC)-binding protein 1 OS=Mus musculus GN=Pcbp1 PE=1 SV=1	843213	129671	745266	112574	2	0
P61161	2	2	80.8	0.0118906	P61161|ARP2_MOUSE Actin-related protein 2 OS=Mus musculus GN=Actr2 PE=1 SV=1	177363	2108.96	156761	1830.89	2	0
P61205;P84084;P61750	3	2	124.57	0.623378	P61205|ARF3_MOUSE ADP-ribosylation factor 3 OS=Mus musculus GN=Arf3 PE=2 SV=2	785763	489827	694489	425244	1	1
P61982	4	2	211.89	0.0492146	P61982|1433G_MOUSE 14-3-3 protein gamma OS=Mus musculus GN=Ywhag PE=1 SV=2	263870	12986.3	233219	11274	2	0
P62821;Q9D1G1	2	2	144.52	0.00470001	P62821|RAB1A_MOUSE Ras-related protein Rab-1A OS=Mus musculus GN=Rab1A PE=1 SV=3	429596	2019.11	379695	1752.89	2	0
P62869	2	2	65.36	0	P62869|ELOB_MOUSE Transcription elongation factor B polypeptide 2 OS=Mus musculus GN=Tceb2 PE=1 SV=1	225076	0	198931	0	2	0
P62996	2	2	146.12	17.8485	P62996|TRA2B_MOUSE Transformer-2 protein homolog beta OS=Mus musculus GN=Tra2b PE=1 SV=1	16543.5	295276	14621.8	256344	0	2
P83870	3	3	154.81	5.93704	P83870|PHF5A_MOUSE PHD finger-like domain-containing protein 5A OS=Mus musculus GN=Phf5a PE=1 SV=1	24075.1	142935	21278.6	124089	0	2
P84228	5	2	226.92	0.0897858	P84228|H32_MOUSE Histone H3.2 OS=Mus musculus GN=Hist1h3b PE=1 SV=2	1.38753e+06	124581	1.22636e+06	108155	2	0
P97315	2	2	124.57	1.46372	P97315|CSRP1_MOUSE Cysteine and glycine-rich protein 1 OS=Mus musculus GN=Csrp1 PE=1 SV=3	215639	315635	190590	274018	1	1
P97371	2	2	105.44	0.18683	P97371|PSME1_MOUSE Proteasome activator complex subunit 1 OS=Mus musculus GN=Psme1 PE=1 SV=2	301951	56413.5	266876	48975.4	2	0
P97372	2	2	80.41	0	P97372|PSME2_MOUSE Proteasome activator complex subunit 2 OS=Mus musculus GN=Psme2 PE=1 SV=4	552447	0	488275	0	2	0
P97447	4	4	185.01	3.03873	P97447|FHL1_MOUSE Four and a half LIM domains protein 1 OS=Mus musculus GN=Fhl1 PE=1 SV=3	154590	469758	136633	407820	1	1
Q3THE2;Q9CQ19	2	2	92.89	0.32613	Q3THE2|ML12B_MOUSE Myosin regulatory light chain 12B OS=Mus musculus GN=Myl12b PE=1 SV=2	417156	136047	368699	118109	2	0
Q5F2E7	2	2	145.44	17.0993	Q5F2E7|NUFP2_MOUSE Nuclear fragile X mental retardation-interacting protein 2 OS=Mus musculus GN=Nufip2 PE=1 SV=1	134264	2.29582e+06	118668	1.99312e+06	0	2
Q6GSS7	3	2	212.45	0.00368014	Q6GSS7|H2A2A_MOUSE Histone H2A type 2-A OS=Mus musculus GN=Hist2h2aa1 PE=1 SV=3	3.94777e+06	14528.3	3.4892e+06	12612.8	2	0
Q6IFX2	12	2	761.5	5.93776	Q6IFX2|K1C42_MOUSE Keratin, type I cytoskeletal 42 OS=Mus musculus GN=Krt42 PE=1 SV=1	369981	2.19686e+06	327004	1.90721e+06	1	1
Q6P1F6;Q6ZWR4	3	2	164.4	0.287576	Q6P1F6|2ABA_MOUSE Serine/threonine-protein phosphatase 2A 55 kDa regulatory subunit B alpha isoform OS=Mus musculus GN=Ppp2r2a PE=1 SV=1	193803	55733	171291	48384.7	2	0
Q6S5C2	3	3	119.23	0.885338	Q6S5C2|GNPTG_MOUSE N-acetylglucosamine-1-phosphotransferase subunit gamma OS=Mus musculus GN=Gnptg PE=1 SV=1	448118	396736	396065	344427	1	1
Q7TQ33	2	2	65.34	0	Q7TQ33|RGMB_MOUSE RGM domain family member B OS=Mus musculus GN=Rgmb PE=1 SV=1	159693	0	141143	0	2	0
Q8BHG1	2	2	70.6	0	Q8BHG1|NRDC_MOUSE Nardilysin OS=Mus musculus GN=Nrdc PE=1 SV=1	98075.4	0	86683	0	2	0
Q8BHJ5	5	2	307.31	0.0255391	Q8BHJ5|TBL1R_MOUSE F-box-like/WD repeat-containing protein TBL1XR1 OS=Mus musculus GN=Tbl1xr1 PE=1 SV=1	269428	6880.96	238132	5973.71	2	0
Q8BJY1	2	2	125.25	0.216047	Q8BJY1|PSMD5_MOUSE 26S proteasome non-ATPase regulatory subunit 5 OS=Mus musculus GN=Psmd5 PE=1 SV=4	202883	43832.3	179316	38053	2	0
Q8BK67	1	1	73.93	0.326257	Q8BK67|RCC2_MOUSE Protein RCC2 OS=Mus musculus GN=Rcc2 PE=1 SV=1	122172	39859.3	107980	34603.9	2	0
Q8BMJ3	1	1	48.98	0.243341	Q8BMJ3|IF1AX_MOUSE Eukaryotic translation initiation factor 1A, X-chromosomal OS=Mus musculus GN=Eif1ax PE=2 SV=3	154485	37592.5	136540	32636	1	1
Q8CAY6	2	2	75.77	0.0122489	Q8CAY6|THIC_MOUSE Acetyl-CoA acetyltransferase, cytosolic OS=Mus musculus GN=Acat2 PE=1 SV=2	1.37425e+06	16833	1.21461e+06	14613.6	2	0
Q8CHH9	10	5	459.88	0.00656328	Q8CHH9|SEPT8_MOUSE Septin-8 OS=Mus musculus GN=Sept8 PE=1 SV=4	711587	4670.35	628930	4054.57	2	0
Q8JZQ9	2	2	66.28	0	Q8JZQ9|EIF3B_MOUSE Eukaryotic translation initiation factor 3 subunit B OS=Mus musculus GN=Eif3b PE=1 SV=1	372498	0	329229	0	2	0
Q8K019	4	3	162.92	0.687189	Q8K019|BCLF1_MOUSE Bcl-2-associated transcription factor 1 OS=Mus musculus GN=Bclaf1 PE=1 SV=2	625662	429949	552986	373260	2	0
Q8K183	1	1	117.13	0.0305318	Q8K183|PDXK_MOUSE Pyridoxal kinase OS=Mus musculus GN=Pdxk PE=1 SV=1	299482	9143.75	264695	7938.15	2	0
Q8R5H1	3	3	176.04	0.49969	Q8R5H1|UBP15_MOUSE Ubiquitin carboxyl-terminal hydrolase 15 OS=Mus musculus GN=Usp15 PE=1 SV=1	106039	52986.8	93721.8	46000.5	1	1
Q8R149	2	2	97.67	419.604	Q8R149|BUD13_MOUSE BUD13 homolog OS=Mus musculus GN=Bud13 PE=1 SV=1	2787.75	1.16975e+06	2463.93	1.01552e+06	0	2
Q8VBW6	2	2	113.71	0	Q8VBW6|ULA1_MOUSE NEDD8-activating enzyme E1 regulatory subunit OS=Mus musculus GN=Nae1 PE=1 SV=1	259832	0	229650	0	2	0
Q8VCF1	3	3	177.4	7.04716	Q8VCF1|CANT1_MOUSE Soluble calcium-activated nucleotidase 1 OS=Mus musculus GN=Cant1 PE=2 SV=1	38085.6	268395	33661.6	233007	0	2
Q8VDM4	2	2	76.28	0.0105294	Q8VDM4|PSMD2_MOUSE 26S proteasome non-ATPase regulatory subunit 2 OS=Mus musculus GN=Psmd2 PE=1 SV=1	153580	1617.11	135740	1403.89	2	0
Q8VED5	4	1	292.32	0.963593	Q8VED5|K2C79_MOUSE Keratin, type II cytoskeletal 79 OS=Mus musculus GN=Krt79 PE=1 SV=2	2.67046e+06	2.57324e+06	2.36026e+06	2.23396e+06	1	1
Q9CPU0	2	2	79.75	0.468598	Q9CPU0|LGUL_MOUSE Lactoylglutathione lyase OS=Mus musculus GN=Glo1 PE=1 SV=3	185556	86951	164002	75486.6	2	0
Q9CQI6	2	2	90.53	0.00750481	Q9CQI6|COTL1_MOUSE Coactosin-like protein OS=Mus musculus GN=Cotl1 PE=1 SV=3	501098	3760.64	442890	3264.8	2	0
Q9CS42	1	1	74.27	0.501879	Q9CS42|PRPS2_MOUSE Ribose-phosphate pyrophosphokinase 2 OS=Mus musculus GN=Prps2 PE=1 SV=4	116818	58628.3	103248	50898.2	1	1
Q9CVB6	2	2	84.96	0.0880642	Q9CVB6|ARPC2_MOUSE Actin-related protein 2/3 complex subunit 2 OS=Mus musculus GN=Arpc2 PE=1 SV=3	183677	16175.4	162341	14042.7	2	0
Q9CWJ9	2	2	92.26	1.55053	Q9CWJ9|PUR9_MOUSE Bifunctional purine biosynthesis protein PURH OS=Mus musculus GN=Atic PE=1 SV=2	274513	425639	242626	369519	2	0
Q9CWZ3	2	2	104.02	0.988083	Q9CWZ3|RBM8A_MOUSE RNA-binding protein 8A OS=Mus musculus GN=Rbm8a PE=1 SV=4	197113	194764	174216	169084	1	1
Q9CXW4	2	2	59.07	8.94232	Q9CXW4|RL11_MOUSE 60S ribosomal protein L11 OS=Mus musculus GN=Rpl11 PE=1 SV=4	52935.6	473368	46786.7	410954	0	2
Q9CZ44	2	2	141.24	0	Q9CZ44|NSF1C_MOUSE NSFL1 cofactor p47 OS=Mus musculus GN=Nsfl1c PE=1 SV=1	131838	0	116524	0	2	0
Q9D0I9	2	2	112.4	0	Q9D0I9|SYRC_MOUSE Arginine--tRNA ligase, cytoplasmic OS=Mus musculus GN=Rars PE=1 SV=2	64217.7	0	56758.2	0	2	0
Q9D711	2	2	103.74	0.097643	Q9D711|PIR_MOUSE Pirin OS=Mus musculus GN=Pir PE=1 SV=1	250650	24474.2	221535	21247.3	2	0
Q9DBG3	2	1	77.43	0.335817	Q9DBG3|AP2B1_MOUSE AP-2 complex subunit beta OS=Mus musculus GN=Ap2b1 PE=1 SV=1	188132	63177.9	166279	54847.9	1	1
Q9DCC4	2	2	72.6	0.0269843	Q9DCC4|P5CR3_MOUSE Pyrroline-5-carboxylate reductase 3 OS=Mus musculus GN=Pycrl PE=1 SV=2	1.16468e+06	31428.1	1.02939e+06	27284.3	2	0
Q9EP52	2	2	99.37	0.244525	Q9EP52|TWSG1_MOUSE Twisted gastrulation protein homolog 1 OS=Mus musculus GN=Twsg1 PE=1 SV=1	794214	194206	701959	168600	2	0
Q9ESU6	5	5	238.14	1.06349	Q9ESU6|BRD4_MOUSE Bromodomain-containing protein 4 OS=Mus musculus GN=Brd4 PE=1 SV=2	186405	198239	164752	172102	1	1
Q9ESX5	2	2	93.97	14.1982	Q9ESX5|DKC1_MOUSE H/ACA ribonucleoprotein complex subunit 4 OS=Mus musculus GN=Dkc1 PE=1 SV=4	61591.9	874492	54437.4	759191	0	2
Q9JHI0	2	2	91.77	37.2046	Q9JHI0|MMP19_MOUSE Matrix metalloproteinase-19 OS=Mus musculus GN=Mmp19 PE=2 SV=1	62629.5	2.33011e+06	55354.5	2.02288e+06	0	2
Q9JHK4	2	2	101.99	0.0913043	Q9JHK4|PGTA_MOUSE Geranylgeranyl transferase type-2 subunit alpha OS=Mus musculus GN=Rabggta PE=1 SV=1	200426	18299.8	177145	15886.9	2	0
Q9JKF1	2	2	93.39	0.11145	Q9JKF1|IQGA1_MOUSE Ras GTPase-activating-like protein IQGAP1 OS=Mus musculus GN=Iqgap1 PE=1 SV=2	179310	19984.1	158482	17349.2	2	0
Q9JLL0	1	1	82.87	1.12592	Q9JLL0|CRIM1_MOUSE Cysteine-rich motor neuron 1 protein OS=Mus musculus GN=Crim1 PE=2 SV=2	14730.1	16585	13019.1	14398.2	1	1
Q9QUI0;Q62159	2	2	101.59	0.26983	Q9QUI0|RHOA_MOUSE Transforming protein RhoA OS=Mus musculus GN=Rhoa PE=1 SV=1	459045	123864	405723	107533	2	0
Q9QZF2	2	2	147.96	92.4789	Q9QZF2|GPC1_MOUSE Glypican-1 OS=Mus musculus GN=Gpc1 PE=1 SV=1	288739	2.67023e+07	255200	2.31816e+07	2	0
Q9QZM3	2	2	64.54	#DIV/0!	Q9QZM3|CLCF1_MOUSE Cardiotrophin-like cytokine factor 1 OS=Mus musculus GN=Clcf1 PE=2 SV=1	0	541462	0	470070	0	2
Q9WU28	2	2	86.63	8.40726	Q9WU28|PFD5_MOUSE Prefoldin subunit 5 OS=Mus musculus GN=Pfdn5 PE=1 SV=1	85005.7	714665	75131.4	620437	2	0
Q9WU78	2	2	117.15	0	Q9WU78|PDC6I_MOUSE Programmed cell death 6-interacting protein OS=Mus musculus GN=Pdcd6ip PE=1 SV=3	63357.2	0	55997.7	0	2	0
Q9WUP7	2	2	84.08	0	Q9WUP7|UCHL5_MOUSE Ubiquitin carboxyl-terminal hydrolase isozyme L5 OS=Mus musculus GN=Uchl5 PE=1 SV=2	106716	0	94320.2	0	2	0
Q9WV32	3	3	121.45	1.04856	Q9WV32|ARC1B_MOUSE Actin-related protein 2/3 complex subunit 1B OS=Mus musculus GN=Arpc1b PE=1 SV=4	174582	183060	154303	158924	0	2
Q9Z1Q9	1	1	45.33	2.76045	Q9Z1Q9|SYVC_MOUSE Valine--tRNA ligase OS=Mus musculus GN=Vars PE=1 SV=1	21446.3	59201.6	18955.1	51395.9	0	2
Q9Z1R2	2	2	73.57	0	Q9Z1R2|BAG6_MOUSE Large proline-rich protein BAG6 OS=Mus musculus GN=Bag6 PE=1 SV=1	140351	0	124048	0	2	0
Q9Z1Z2	2	2	103.62	0.163498	Q9Z1Z2|STRAP_MOUSE Serine-threonine kinase receptor-associated protein OS=Mus musculus GN=Strap PE=1 SV=2	389052	63609.3	343860	55222.4	2	0
Q9Z2D6	5	5	231.01	308.037	Q9Z2D6|MECP2_MOUSE Methyl-CpG-binding protein 2 OS=Mus musculus GN=Mecp2 PE=1 SV=1	2127.98	655497	1880.8	569070	0	2
Q52KI8	1	1	61.88	1.07903	Q52KI8|SRRM1_MOUSE Serine/arginine repetitive matrix protein 1 OS=Mus musculus GN=Srrm1 PE=1 SV=2	61928.7	66823	54735.1	58012.4	1	1
Q68SA9	1	1	74.35	0.490384	Q68SA9|ATS7_MOUSE A disintegrin and metalloproteinase with thrombospondin motifs 7 OS=Mus musculus GN=Adamts7 PE=1 SV=3	119546	58623.7	105660	50894.2	1	1
Q76MZ3;Q7TNP2	4	4	193.76	0.0663372	Q76MZ3|2AAA_MOUSE Serine/threonine-protein phosphatase 2A 65 kDa regulatory subunit A alpha isoform OS=Mus musculus GN=Ppp2r1a PE=1 SV=3	437679	29034.4	386838	25206.2	2	0
Q78PY7	2	2	72.15	0.605171	Q78PY7|SND1_MOUSE Staphylococcal nuclease domain-containing protein 1 OS=Mus musculus GN=Snd1 PE=1 SV=1	90761.7	54926.4	80218.9	47684.3	1	1
Q78ZA7	3	2	142.78	0	Q78ZA7|NP1L4_MOUSE Nucleosome assembly protein 1-like 4 OS=Mus musculus GN=Nap1l4 PE=1 SV=1	570949	0	504628	0	2	0
Q80WM4	2	2	171.91	#DIV/0!	Q80WM4|HPLN4_MOUSE Hyaluronan and proteoglycan link protein 4 OS=Mus musculus GN=Hapln4 PE=2 SV=2	0	553727	0	480719	0	2
Q91V12	2	2	126.17	0.640662	Q91V12|BACH_MOUSE Cytosolic acyl coenzyme A thioester hydrolase OS=Mus musculus GN=Acot7 PE=1 SV=2	153928	98615.9	136048	85613.4	2	0
Q91VA3	2	2	76.79	0.0551532	Q91VA3|CAN8_MOUSE Calpain-8 OS=Mus musculus GN=Capn8 PE=1 SV=1	322672	17796.4	285191	15450	2	0
Q91WJ8	5	4	259.26	0.234065	Q91WJ8|FUBP1_MOUSE Far upstream element-binding protein 1 OS=Mus musculus GN=Fubp1 PE=1 SV=1	163745	38326.9	144724	33273.5	2	0
Q91YN5;Q3TW96	2	2	89.12	0.250728	Q91YN5|UAP1_MOUSE UDP-N-acetylhexosamine pyrophosphorylase OS=Mus musculus GN=Uap1 PE=1 SV=1	80953.1	20297.2	71549.7	17621	2	0
Q99J09	2	2	108.95	0.0442424	Q99J09|MEP50_MOUSE Methylosome protein 50 OS=Mus musculus GN=Wdr77 PE=1 SV=1	2.18418e+06	96633.3	1.93047e+06	83892.3	2	0
Q99JW2	2	2	74.66	0.159138	Q99JW2|ACY1_MOUSE Aminoacylase-1 OS=Mus musculus GN=Acy1 PE=1 SV=1	55103.8	8769.08	48703	7612.88	2	0
Q99K85	2	2	105.38	0	Q99K85|SERC_MOUSE Phosphoserine aminotransferase OS=Mus musculus GN=Psat1 PE=1 SV=1	313369	0	276968	0	2	0
Q99KK7	2	2	158.08	0.371017	Q99KK7|DPP3_MOUSE Dipeptidyl peptidase 3 OS=Mus musculus GN=Dpp3 PE=1 SV=2	205152	76114.7	181322	66079	2	0
Q99LX0	2	2	88.28	0	Q99LX0|PARK7_MOUSE Protein deglycase DJ-1 OS=Mus musculus GN=Park7 PE=1 SV=1	409665	0	362078	0	2	0
Q569Z6	4	3	275.01	13.0597	Q569Z6|TR150_MOUSE Thyroid hormone receptor-associated protein 3 OS=Mus musculus GN=Thrap3 PE=1 SV=1	182410	2.38222e+06	161221	2.06813e+06	0	2
Q810A7	1	1	39.21	6.51443	Q810A7|DDX42_MOUSE ATP-dependent RNA helicase DDX42 OS=Mus musculus GN=Ddx42 PE=1 SV=3	182071	1.18609e+06	160922	1.02971e+06	0	2
Q920A5	1	1	75.68	1.31616	Q920A5|RISC_MOUSE Retinoid-inducible serine carboxypeptidase OS=Mus musculus GN=Scpep1 PE=1 SV=2	133903	176239	118349	153002	1	1
Q922U2	10	4	633.12	1.00545	Q922U2|K2C5_MOUSE Keratin, type II cytoskeletal 5 OS=Mus musculus GN=Krt5 PE=1 SV=1	375279	377323	331687	327573	1	1
Q923D2	4	4	265.72	0.00865207	Q923D2|BLVRB_MOUSE Flavin reductase (NADPH) OS=Mus musculus GN=Blvrb PE=1 SV=3	1.63844e+06	14175.9	1.44812e+06	12306.8	2	0
Q924M7	2	2	73.06	0	Q924M7|MPI_MOUSE Mannose-6-phosphate isomerase OS=Mus musculus GN=Mpi PE=1 SV=1	98568.8	0	87119.1	0	2	0
Q04857	2	2	135.41	4.71966	Q04857|CO6A1_MOUSE Collagen alpha-1(VI) chain OS=Mus musculus GN=Col6a1 PE=1 SV=1	117493	554527	103845	481413	0	2
Q60864	3	3	175.49	0.0606009	Q60864|STIP1_MOUSE Stress-induced-phosphoprotein 1 OS=Mus musculus GN=Stip1 PE=1 SV=1	1.82049e+06	110323	1.60903e+06	95777.4	2	0
Q61112	4	4	187.15	4.24948	Q61112|CAB45_MOUSE 45 kDa calcium-binding protein OS=Mus musculus GN=Sdf4 PE=1 SV=1	237868	1.01081e+06	210237	877538	0	2
Q62093	1	1	56.26	1.00079	Q62093|SRSF2_MOUSE Serine/arginine-rich splicing factor 2 OS=Mus musculus GN=Srsf2 PE=1 SV=4	175792	175931	155372	152735	1	1
Q62422	2	2	106.64	0.0187771	Q62422|OSTF1_MOUSE Osteoclast-stimulating factor 1 OS=Mus musculus GN=Ostf1 PE=1 SV=2	226553	4254	200237	3693.11	2	0
Q99020	3	2	147.79	0	Q99020|ROAA_MOUSE Heterogeneous nuclear ribonucleoprotein A/B OS=Mus musculus GN=Hnrnpab PE=1 SV=1	176403	0	155912	0	2	0
O08795	2	2	133.42	0.110634	O08795|GLU2B_MOUSE Glucosidase 2 subunit beta OS=Mus musculus GN=Prkcsh PE=1 SV=1	582555	64450.4	514886	55952.6	2	1
Q8K1H9	34	34	3416.86	570.908	Q8K1H9|OBP2A_MOUSE Odorant-binding protein 2a OS=Mus musculus GN=Obp2a PE=2 SV=1	7.22784e+07	4.12643e+10	6.38826e+07	3.58236e+10	0	254
O55123;P28862	2	2	113.75	0.662316	O55123|MMP10_MOUSE Stromelysin-2 OS=Mus musculus GN=Mmp10 PE=2 SV=1	125591	83180.8	111002	72213.5	2	1
O70433	4	4	225.13	0.00545344	O70433|FHL2_MOUSE Four and a half LIM domains protein 2 OS=Mus musculus GN=Fhl2 PE=1 SV=1	230908	1259.24	204086	1093.21	3	0
O88738	1	1	33.97	6.15406	O88738|BIRC6_MOUSE Baculoviral IAP repeat-containing protein 6 OS=Mus musculus GN=Birc6 PE=1 SV=2	201400	1.23943e+06	178005	1.07601e+06	1	2
P02301;P68433	5	2	234.8	0.108793	P02301|H3C_MOUSE Histone H3.3C OS=Mus musculus GN=H3f3c PE=3 SV=3	1.15945e+06	126140	1.02477e+06	109508	2	1
P06151	3	3	155.03	0.0751327	P06151|LDHA_MOUSE L-lactate dehydrogenase A chain OS=Mus musculus GN=Ldha PE=1 SV=3	455944	34256.3	402982	29739.6	3	0
P06684	1	1	49.27	0.0260067	P06684|CO5_MOUSE Complement C5 OS=Mus musculus GN=C5 PE=1 SV=2	4.47031e+06	116258	3.95104e+06	100929	3	0
P08207	2	2	80.07	0.0750203	P08207|S10AA_MOUSE Protein S100-A10 OS=Mus musculus GN=S100a10 PE=1 SV=2	5.25197e+06	394004	4.6419e+06	342055	3	0
P15105	3	3	132.6	7.19488	P15105|GLNA_MOUSE Glutamine synthetase OS=Mus musculus GN=Glul PE=1 SV=6	1.02634e+06	7.38437e+06	907118	6.41075e+06	3	0
P23492	3	3	133.93	0.0936814	P23492|PNPH_MOUSE Purine nucleoside phosphorylase OS=Mus musculus GN=Pnp PE=1 SV=2	1.7146e+06	160626	1.51543e+06	139448	3	0
Q9Z1W4	2	2	204.37	474.577	Q9Z1W4|GDF11_MOUSE Growth/differentiation factor 11 OS=Mus musculus GN=Gdf11 PE=2 SV=1	3270.29	1.552e+06	2890.41	1.34737e+06	0	4
P26369	6	6	317.73	0.371062	P26369|U2AF2_MOUSE Splicing factor U2AF 65 kDa subunit OS=Mus musculus GN=U2af2 PE=1 SV=3	400728	148695	354180	129090	3	0
P45376	2	2	78.92	0.177714	P45376|ALDR_MOUSE Aldose reductase OS=Mus musculus GN=Akr1b1 PE=1 SV=3	695926	123676	615088	107369	2	1
P45591	3	2	163.76	0.232372	P45591|COF2_MOUSE Cofilin-2 OS=Mus musculus GN=Cfl2 PE=1 SV=1	2.91188e+06	676639	2.57364e+06	587424	2	1
P50396	4	3	258.8	0.000915985	P50396|GDIA_MOUSE Rab GDP dissociation inhibitor alpha OS=Mus musculus GN=Gdi1 PE=1 SV=3	179173	164.12	158360	142.48	3	0
P60122	4	4	163.09	0.00524624	P60122|RUVB1_MOUSE RuvB-like 1 OS=Mus musculus GN=Ruvbl1 PE=1 SV=1	514643	2699.94	454863	2343.96	3	0
Q6A065	5	5	259.99	338.717	Q6A065|CE170_MOUSE Centrosomal protein of 170 kDa OS=Mus musculus GN=Cep170 PE=1 SV=2	2491	843744	2201.64	732497	0	3
P62748;P84075;Q91X97	5	5	232.07	0.105396	P62748|HPCL1_MOUSE Hippocalcin-like protein 1 OS=Mus musculus GN=Hpcal1 PE=1 SV=2	1.04025e+06	109639	919419	95182.9	3	0
P62774	3	3	120.5	0.0617867	P62774|MTPN_MOUSE Myotrophin OS=Mus musculus GN=Mtpn PE=1 SV=2	825339	50994.9	729468	44271.3	3	0
P62814	3	3	141.43	0.0454191	P62814|VATB2_MOUSE V-type proton ATPase subunit B, brain isoform OS=Mus musculus GN=Atp6v1b2 PE=1 SV=1	643814	29241.4	569029	25386	3	0
P62908	3	3	144.89	2.09924	P62908|RS3_MOUSE 40S ribosomal protein S3 OS=Mus musculus GN=Rps3 PE=1 SV=1	414059	869208	365962	754603	1	2
P62983	2	2	167.38	1.91938	P62983|RS27A_MOUSE Ubiquitin-40S ribosomal protein S27a OS=Mus musculus GN=Rps27a PE=1 SV=2	359293	689621	317558	598695	1	2
P63101	5	3	370.25	0.00407036	P63101|1433Z_MOUSE 14-3-3 protein zeta/delta OS=Mus musculus GN=Ywhaz PE=1 SV=1	587654	2391.96	519392	2076.58	3	0
P67984	3	3	94.62	0.0657197	P67984|RL22_MOUSE 60S ribosomal protein L22 OS=Mus musculus GN=Rpl22 PE=1 SV=2	501248	32941.9	443024	28598.5	3	0
P68033;P62737	10	1	597.03	0.651993	P68033|ACTC_MOUSE Actin, alpha cardiac muscle 1 OS=Mus musculus GN=Actc1 PE=1 SV=1	5.0545e+06	3.2955e+06	4.46737e+06	2.86099e+06	1	2
P70296	2	2	99.85	0.00750119	P70296|PEBP1_MOUSE Phosphatidylethanolamine-binding protein 1 OS=Mus musculus GN=Pebp1 PE=1 SV=3	3.64712e+06	27357.7	3.22347e+06	23750.6	3	0
Q62181	38	38	2640.89	113.798	Q62181|SEM3C_MOUSE Semaphorin-3C OS=Mus musculus GN=Sema3c PE=1 SV=2	3.80576e+06	4.33088e+08	3.36368e+06	3.75986e+08	3	74
P97351	3	3	192.61	0.756981	P97351|RS3A_MOUSE 40S ribosomal protein S3a OS=Mus musculus GN=Rps3a PE=1 SV=3	265691	201123	234829	174605	2	1
Q3U0V1;P97784	4	3	168.39	0.105277	Q3U0V1|FUBP2_MOUSE Far upstream element-binding protein 2 OS=Mus musculus GN=Khsrp PE=1 SV=2	526395	55417	465249	48110.3	3	0
Q3U7R1	3	3	159.13	0.0955143	Q3U7R1|ESYT1_MOUSE Extended synaptotagmin-1 OS=Mus musculus GN=Esyt1 PE=1 SV=2	1.24216e+06	118644	1.09787e+06	103001	3	0
P04925	4	4	172.76	77.7058	P04925|PRIO_MOUSE Major prion protein OS=Mus musculus GN=Prnp PE=1 SV=2	100929	7.8428e+06	89205.5	6.80873e+06	1	3
P11152;Q9WVG5	12	12	856.57	77.2787	P11152|LIPL_MOUSE Lipoprotein lipase OS=Mus musculus GN=Lpl PE=1 SV=3	990648	7.6556e+07	875575	6.64621e+07	2	20
Q8BH97	5	5	435.38	1.29287	Q8BH97|RCN3_MOUSE Reticulocalbin-3 OS=Mus musculus GN=Rcn3 PE=1 SV=1	1.76478e+06	2.28163e+06	1.55979e+06	1.9808e+06	2	1
Q8BVE3	3	3	116.08	0.130774	Q8BVE3|VATH_MOUSE V-type proton ATPase subunit H OS=Mus musculus GN=Atp6v1h PE=1 SV=1	180734	23635.3	159740	20519	3	0
Q8C1A5	3	3	127.98	0	Q8C1A5|THOP1_MOUSE Thimet oligopeptidase OS=Mus musculus GN=Thop1 PE=1 SV=1	534887	0	472754	0	3	0
Q8CDN6	3	3	176.16	0.00545104	Q8CDN6|TXNL1_MOUSE Thioredoxin-like protein 1 OS=Mus musculus GN=Txnl1 PE=1 SV=3	594409	3240.15	525362	2812.93	3	0
Q8CI94;Q9ET01	3	3	167.93	0.0280288	Q8CI94|PYGB_MOUSE Glycogen phosphorylase, brain form OS=Mus musculus GN=Pygb PE=1 SV=3	164709	4616.61	145577	4007.91	3	0
Q8CJG0;Q8CJF9;Q8CJF8	3	3	112.13	0.0543827	Q8CJG0|AGO2_MOUSE Protein argonaute-2 OS=Mus musculus GN=Ago2 PE=1 SV=3	254514	13841.1	224949	12016.2	3	0
Q08048	15	15	875.65	75.1099	Q08048|HGF_MOUSE Hepatocyte growth factor OS=Mus musculus GN=Hgf PE=1 SV=1	787543	5.91522e+07	696062	5.1353e+07	4	21
Q9CQV8	4	2	357.57	0.0756651	Q9CQV8|1433B_MOUSE 14-3-3 protein beta/alpha OS=Mus musculus GN=Ywhab PE=1 SV=3	322855	24428.9	285353	21207.9	3	0
Q9DBJ1	3	3	150.9	0.259282	Q9DBJ1|PGAM1_MOUSE Phosphoglycerate mutase 1 OS=Mus musculus GN=Pgam1 PE=1 SV=3	2.08454e+06	540484	1.8424e+06	469222	1	2
Q9DBR7	4	4	220.37	0.0875144	Q9DBR7|MYPT1_MOUSE Protein phosphatase 1 regulatory subunit 12A OS=Mus musculus GN=Ppp1r12a PE=1 SV=2	465441	40732.8	411376	35362.2	3	0
Q9EQH2	3	3	121.07	0.0859288	Q9EQH2|ERAP1_MOUSE Endoplasmic reticulum aminopeptidase 1 OS=Mus musculus GN=Erap1 PE=1 SV=2	302654	26006.7	267498	22577.8	3	0
Q9JII6;Q9DCT1	3	3	131.4	0.3915	Q9JII6|AK1A1_MOUSE Alcohol dehydrogenase [NADP(+)] OS=Mus musculus GN=Akr1a1 PE=1 SV=3	566948	221960	501091	192694	3	0
Q9QYB1	3	3	177.05	0.401258	Q9QYB1|CLIC4_MOUSE Chloride intracellular channel protein 4 OS=Mus musculus GN=Clic4 PE=1 SV=3	512365	205590	452849	178483	3	0
Q9R0P5	3	3	136.85	0.398273	Q9R0P5|DEST_MOUSE Destrin OS=Mus musculus GN=Dstn PE=1 SV=3	902895	359599	798015	312186	3	0
Q9R0Q7	4	4	187.26	0.876054	Q9R0Q7|TEBP_MOUSE Prostaglandin E synthase 3 OS=Mus musculus GN=Ptges3 PE=1 SV=1	1.34585e+06	1.17904e+06	1.18952e+06	1.02358e+06	2	1
Q61207	5	5	387.48	72.4903	Q61207|SAP_MOUSE Prosaposin OS=Mus musculus GN=Psap PE=1 SV=2	760817	5.51519e+07	672441	4.78801e+07	2	8
Q9WVJ9	6	6	328.19	0.353702	Q9WVJ9|FBLN4_MOUSE EGF-containing fibulin-like extracellular matrix protein 2 OS=Mus musculus GN=Efemp2 PE=1 SV=1	923594	326677	816309	283605	2	1
Q9Z0N1;Q9Z0N2	2	2	155.05	0.395614	Q9Z0N1|IF2G_MOUSE Eukaryotic translation initiation factor 2 subunit 3, X-linked OS=Mus musculus GN=Eif2s3x PE=1 SV=2	1.40772e+06	556913	1.2442e+06	483485	2	1
Q9Z2V5	2	2	88.44	1.82954	Q9Z2V5|HDAC6_MOUSE Histone deacetylase 6 OS=Mus musculus GN=Hdac6 PE=1 SV=3	221919	406009	196141	352477	1	2
Q91W89	3	3	211.96	108.358	Q91W89|MA2C1_MOUSE Alpha-mannosidase 2C1 OS=Mus musculus GN=Man2c1 PE=1 SV=1	830558	8.99974e+07	734081	7.81313e+07	3	0
Q91WQ3	3	3	95.7	0.0424389	Q91WQ3|SYYC_MOUSE Tyrosine--tRNA ligase, cytoplasmic OS=Mus musculus GN=Yars PE=1 SV=3	321189	13630.9	283879	11833.7	3	0
Q91YE6	4	4	208.99	0.0787078	Q91YE6|IPO9_MOUSE Importin-9 OS=Mus musculus GN=Ipo9 PE=1 SV=3	445987	35102.7	394182	30474.4	3	0
Q99JX4	3	3	128	0.0307361	Q99JX4|EIF3M_MOUSE Eukaryotic translation initiation factor 3 subunit M OS=Mus musculus GN=Eif3m PE=1 SV=1	174467	5362.44	154201	4655.4	3	0
Q99K51;Q3V0K9;Q61233	3	3	155.84	0	Q99K51|PLST_MOUSE Plastin-3 OS=Mus musculus GN=Pls3 PE=1 SV=3	207043	0	182993	0	3	0
Q99L47	4	4	227.83	0.283452	Q99L47|F10A1_MOUSE Hsc70-interacting protein OS=Mus musculus GN=St13 PE=1 SV=1	1.29145e+06	366064	1.14143e+06	317798	3	0
Q9Z315	10	10	720.11	61.8172	Q9Z315|SNUT1_MOUSE U4/U6.U5 tri-snRNP-associated protein 1 OS=Mus musculus GN=Sart1 PE=1 SV=1	80833.4	4.99689e+06	71443.8	4.33805e+06	0	11
Q921M7	3	3	209.25	0.0426473	Q921M7|FA49B_MOUSE Protein FAM49B OS=Mus musculus GN=Fam49b PE=1 SV=1	492116	20987.4	434952	18220.3	3	0
Q922Q9	3	3	98.36	0.0434291	Q922Q9|CHID1_MOUSE Chitinase domain-containing protein 1 OS=Mus musculus GN=Chid1 PE=1 SV=1	421777	18317.4	372783	15902.2	3	0
Q02053	3	2	245.61	0.179555	Q02053|UBA1_MOUSE Ubiquitin-like modifier-activating enzyme 1 OS=Mus musculus GN=Uba1 PE=1 SV=1	1.31054e+06	235313	1.15831e+06	204287	3	0
Q08943	2	2	71.82	23.0833	Q08943|SSRP1_MOUSE FACT complex subunit SSRP1 OS=Mus musculus GN=Ssrp1 PE=1 SV=2	15647.2	361190	13829.7	313567	1	2
Q60605	3	3	138.02	0.118997	Q60605|MYL6_MOUSE Myosin light polypeptide 6 OS=Mus musculus GN=Myl6 PE=1 SV=3	349637	41605.7	309023	36120	3	0
Q60668	4	2	164.4	0.337438	Q60668|HNRPD_MOUSE Heterogeneous nuclear ribonucleoprotein D0 OS=Mus musculus GN=Hnrnpd PE=1 SV=2	1.39689e+06	471363	1.23462e+06	409214	2	1
P20060	3	3	175.56	61.1359	P20060|HEXB_MOUSE Beta-hexosaminidase subunit beta OS=Mus musculus GN=Hexb PE=1 SV=2	444783	2.71922e+07	393117	2.36069e+07	1	6
Q61316	3	3	139.47	0.0409818	Q61316|HSP74_MOUSE Heat shock 70 kDa protein 4 OS=Mus musculus GN=Hspa4 PE=1 SV=1	425528	17438.9	376099	15139.6	3	0
Q61508	2	2	82.85	1.01347	Q61508|ECM1_MOUSE Extracellular matrix protein 1 OS=Mus musculus GN=Ecm1 PE=1 SV=2	785753	796335	694480	691338	1	2
O08529	4	4	128.65	0.119901	O08529|CAN2_MOUSE Calpain-2 catalytic subunit OS=Mus musculus GN=Capn2 PE=1 SV=4	319708	38333.3	282571	33279.1	4	0
Q9D824	4	4	291.62	56.0377	Q9D824|FIP1_MOUSE Pre-mRNA 3'-end-processing factor FIP1 OS=Mus musculus GN=Fip1l1 PE=1 SV=1	713463	3.99809e+07	630588	3.47094e+07	0	7
O70251	4	3	266.46	0.12253	O70251|EF1B_MOUSE Elongation factor 1-beta OS=Mus musculus GN=Eef1b PE=1 SV=5	743306	91077.5	656964	79069	4	0
O88452	2	2	111.88	4.74553	O88452|STC2_MOUSE Stanniocalcin-2 OS=Mus musculus GN=Stc2 PE=1 SV=1	860523	4.08363e+06	760565	3.54521e+06	2	2
P97953	8	8	546.11	53.7704	P97953|VEGFC_MOUSE Vascular endothelial growth factor C OS=Mus musculus GN=Vegfc PE=1 SV=1	392202	2.10889e+07	346644	1.83083e+07	0	12
P16546	5	5	299.98	0.0334632	P16546|SPTN1_MOUSE Spectrin alpha chain, non-erythrocytic 1 OS=Mus musculus GN=Sptan1 PE=1 SV=4	730680	24450.9	645805	21227.1	4	0
P17918	3	3	140.11	0.695011	P17918|PCNA_MOUSE Proliferating cell nuclear antigen OS=Mus musculus GN=Pcna PE=1 SV=2	1.0132e+06	704184	895505	611337	3	1
P19157;P46425	2	2	88.66	0.0250428	P19157|GSTP1_MOUSE Glutathione S-transferase P 1 OS=Mus musculus GN=Gstp1 PE=1 SV=2	1.33666e+06	33473.7	1.18139e+06	29060.2	3	1
P23116	2	2	123.78	0.295272	P23116|EIF3A_MOUSE Eukaryotic translation initiation factor 3 subunit A OS=Mus musculus GN=Eif3a PE=1 SV=5	115680	34157	102242	29653.4	3	1
P46935;Q8CFI0	5	5	361.31	0.174899	P46935|NEDD4_MOUSE E3 ubiquitin-protein ligase NEDD4 OS=Mus musculus GN=Nedd4 PE=1 SV=3	1.3112e+06	229327	1.15889e+06	199090	4	0
P50516	4	4	168.48	0.854361	P50516|VATA_MOUSE V-type proton ATPase catalytic subunit A OS=Mus musculus GN=Atp6v1a PE=1 SV=2	548668	468761	484935	406955	4	0
P62827;Q61820	4	4	187.36	0.382848	P62827|RAN_MOUSE GTP-binding nuclear protein Ran OS=Mus musculus GN=Ran PE=1 SV=3	2.93785e+06	1.12475e+06	2.59659e+06	976452	2	2
P62960;Q9JKB3	2	2	176.69	0.150331	P62960|YBOX1_MOUSE Nuclease-sensitive element-binding protein 1 OS=Mus musculus GN=Ybx1 PE=1 SV=3	1.1327e+06	170280	1.00113e+06	147829	2	2
P47879	10	10	764.33	51.0003	P47879|IBP4_MOUSE Insulin-like growth factor-binding protein 4 OS=Mus musculus GN=Igfbp4 PE=1 SV=2	1.23543e+06	6.3007e+07	1.09192e+06	5.46996e+07	2	20
P70274	2	2	87.1	43.252	P70274|SEPP1_MOUSE Selenoprotein P OS=Mus musculus GN=Sepp1 PE=1 SV=3	338434	1.4638e+07	299122	1.2708e+07	1	3
P97798	4	4	242.51	0.33695	P97798|NEO1_MOUSE Neogenin OS=Mus musculus GN=Neo1 PE=1 SV=1	436773	147171	386038	127766	3	1
Q3UDE2	5	5	247.53	0.902643	Q3UDE2|TTL12_MOUSE Tubulin--tyrosine ligase-like protein 12 OS=Mus musculus GN=Ttll12 PE=1 SV=1	1.30637e+06	1.17919e+06	1.15463e+06	1.02371e+06	3	1
Q6PB90	1	1	35.52	0.0128653	Q6PB90|PCDBE_MOUSE Protocadherin beta-14 OS=Mus musculus GN=Pcdhb14 PE=1 SV=2	1.362e+06	17522.5	1.20379e+06	15212.2	3	1
Q8CFG0;Q8K007	15	15	906.51	41.3547	Q8CFG0|SULF2_MOUSE Extracellular sulfatase Sulf-2 OS=Mus musculus GN=Sulf2 PE=2 SV=2	3.73587e+06	1.54496e+08	3.30191e+06	1.34125e+08	0	25
Q8BFY9	4	4	189.26	0.0471273	Q8BFY9|TNPO1_MOUSE Transportin-1 OS=Mus musculus GN=Tnpo1 PE=1 SV=2	470393	22168.3	415752	19245.4	4	0
Q8BGQ7	4	4	222.26	0.0982552	Q8BGQ7|SYAC_MOUSE Alanine--tRNA ligase, cytoplasmic OS=Mus musculus GN=Aars PE=1 SV=1	520364	51128.4	459918	44387.2	4	0
Q9CQM9	4	4	246.09	0.409498	Q9CQM9|GLRX3_MOUSE Glutaredoxin-3 OS=Mus musculus GN=Glrx3 PE=1 SV=1	1.08157e+06	442900	955932	384503	4	0
Q9CYN9	4	4	253.18	1.23424	Q9CYN9|RENR_MOUSE Renin receptor OS=Mus musculus GN=Atp6ap2 PE=1 SV=2	1.4978e+06	1.84864e+06	1.32382e+06	1.6049e+06	2	2
Q9DCH4	3	3	225.17	0.0247751	Q9DCH4|EIF3F_MOUSE Eukaryotic translation initiation factor 3 subunit F OS=Mus musculus GN=Eif3f PE=1 SV=2	613173	15191.4	541947	13188.5	4	0
Q9JHR7	4	4	163.09	0.00300634	Q9JHR7|IDE_MOUSE Insulin-degrading enzyme OS=Mus musculus GN=Ide PE=1 SV=1	678455	2039.67	599646	1770.74	4	0
Q9JIF0	4	4	150.33	0.684152	Q9JIF0|ANM1_MOUSE Protein arginine N-methyltransferase 1 OS=Mus musculus GN=Prmt1 PE=1 SV=1	747841	511637	660972	444178	3	1
Q9R059	5	5	262.03	0.405589	Q9R059|FHL3_MOUSE Four and a half LIM domains protein 3 OS=Mus musculus GN=Fhl3 PE=1 SV=2	1.3951e+06	565838	1.23305e+06	491232	3	1
Q9Z1Q5	5	5	199.11	0.0997424	Q9Z1Q5|CLIC1_MOUSE Chloride intracellular channel protein 1 OS=Mus musculus GN=Clic1 PE=1 SV=3	2.01494e+06	200975	1.78089e+06	174477	3	1
P98063;Q9WVM6;Q62381	5	5	227.14	38.8533	P98063|BMP1_MOUSE Bone morphogenetic protein 1 OS=Mus musculus GN=Bmp1 PE=1 SV=2	57201	2.22245e+06	50556.6	1.92942e+06	0	5
Q58A65;Q9ESN9	6	6	331.25	0.852308	Q58A65|JIP4_MOUSE C-Jun-amino-terminal kinase-interacting protein 4 OS=Mus musculus GN=Spag9 PE=1 SV=2	578480	493043	511284	428036	4	0
Q91WK2	6	6	252.7	0.0357117	Q91WK2|EIF3H_MOUSE Eukaryotic translation initiation factor 3 subunit H OS=Mus musculus GN=Eif3h PE=1 SV=1	1.08501e+06	38747.6	958977	33638.7	4	0
Q99JY9;Q641P0	4	4	184.01	0.0789766	Q99JY9|ARP3_MOUSE Actin-related protein 3 OS=Mus musculus GN=Actr3 PE=1 SV=3	797692	62999	705033	54692.7	4	0
Q99KC8	3	3	162.41	0.123191	Q99KC8|VMA5A_MOUSE von Willebrand factor A domain-containing protein 5A OS=Mus musculus GN=Vwa5a PE=1 SV=2	1.75015e+06	215602	1.54686e+06	187175	3	1
Q99KW3	4	4	286.11	0.0171706	Q99KW3|TARA_MOUSE TRIO and F-actin-binding protein OS=Mus musculus GN=Triobp PE=1 SV=3	1.23604e+06	21223.5	1.09246e+06	18425.2	4	0
Q99PT1	2	2	101.94	0.0652572	Q99PT1|GDIR1_MOUSE Rho GDP-dissociation inhibitor 1 OS=Mus musculus GN=Arhgdia PE=1 SV=3	2.83128e+06	184761	2.5024e+06	160401	2	2
Q01405	7	6	379.37	0.0637143	Q01405|SC23A_MOUSE Protein transport protein Sec23A OS=Mus musculus GN=Sec23a PE=1 SV=2	469938	29941.8	415350	25994	4	0
Q11011	4	4	162.75	0.00217937	Q11011|PSA_MOUSE Puromycin-sensitive aminopeptidase OS=Mus musculus GN=Npepps PE=1 SV=2	316754	690.323	279960	599.304	4	0
Q60973	8	4	379.12	0.141118	Q60973|RBBP7_MOUSE Histone-binding protein RBBP7 OS=Mus musculus GN=Rbbp7 PE=1 SV=1	711527	100409	628877	87170.4	3	1
Q61206	4	3	217.03	0.136289	Q61206|PA1B2_MOUSE Platelet-activating factor acetylhydrolase IB subunit beta OS=Mus musculus GN=Pafah1b2 PE=1 SV=2	1.28916e+06	175698	1.13941e+06	152532	3	1
Q61398	4	4	264.9	3.27338	Q61398|PCOC1_MOUSE Procollagen C-endopeptidase enhancer 1 OS=Mus musculus GN=Pcolce PE=1 SV=2	306520	1.00336e+06	270915	871065	2	2
Q8BK62	6	6	386.62	34.1519	Q8BK62|OLFL3_MOUSE Olfactomedin-like protein 3 OS=Mus musculus GN=Olfml3 PE=2 SV=2	261225	8.9213e+06	230881	7.74503e+06	0	8
O55131;Q641K1;Q9DA97	14	13	783	0.25518	O55131|SEPT7_MOUSE Septin-7 OS=Mus musculus GN=Sept7 PE=1 SV=1	876878	223761	775021	194259	5	0
P07214	5	5	257.52	0.116816	P07214|SPRC_MOUSE SPARC OS=Mus musculus GN=Sparc PE=1 SV=1	3.46635e+06	404926	3.0637e+06	351537	5	0
Q9JM58	9	8	544.84	27.1107	Q9JM58|CRLF1_MOUSE Cytokine receptor-like factor 1 OS=Mus musculus GN=Crlf1 PE=1 SV=1	273495	7.41463e+06	241726	6.43701e+06	0	9
P12265	4	4	229.05	1.82988	P12265|BGLR_MOUSE Beta-glucuronidase OS=Mus musculus GN=Gusb PE=1 SV=2	1.5945e+06	2.91773e+06	1.40928e+06	2.53303e+06	3	2
P14152	4	4	282.42	0.287622	P14152|MDHC_MOUSE Malate dehydrogenase, cytoplasmic OS=Mus musculus GN=Mdh1 PE=1 SV=3	2.8104e+06	808333	2.48395e+06	701755	5	0
P14206	4	4	253.01	0.116822	P14206|RSSA_MOUSE 40S ribosomal protein SA OS=Mus musculus GN=Rpsa PE=1 SV=4	3.15895e+06	369033	2.79201e+06	320377	4	1
P26039;Q71LX4	5	5	195.68	0.0178042	P26039|TLN1_MOUSE Talin-1 OS=Mus musculus GN=Tln1 PE=1 SV=2	208996	3721	184719	3230.39	5	0
Q8R066	26	25	2500.33	23.8931	Q8R066|C1QT4_MOUSE Complement C1q tumor necrosis factor-related protein 4 OS=Mus musculus GN=C1qtnf4 PE=1 SV=1	1.81372e+07	4.33354e+08	1.60304e+07	3.76216e+08	1	67
P47754	6	5	340.09	0.035984	P47754|CAZA2_MOUSE F-actin-capping protein subunit alpha-2 OS=Mus musculus GN=Capza2 PE=1 SV=3	1.279e+06	46023.4	1.13043e+06	39955.2	5	0
P50247	5	5	269.3	0.0760513	P50247|SAHH_MOUSE Adenosylhomocysteinase OS=Mus musculus GN=Ahcy PE=1 SV=3	1.03251e+06	78524.1	912578	68170.7	5	0
P50580	6	6	340.41	0.688551	P50580|PA2G4_MOUSE Proliferation-associated protein 2G4 OS=Mus musculus GN=Pa2g4 PE=1 SV=3	1.76444e+06	1.21491e+06	1.55948e+06	1.05472e+06	4	1
P56399	5	5	201.44	0.0217222	P56399|UBP5_MOUSE Ubiquitin carboxyl-terminal hydrolase 5 OS=Mus musculus GN=Usp5 PE=1 SV=1	1.05018e+06	22812.3	928191	19804.5	5	0
P62962	3	3	157.94	0.145535	P62962|PROF1_MOUSE Profilin-1 OS=Mus musculus GN=Pfn1 PE=1 SV=2	2.46019e+06	358043	2.17442e+06	310836	3	2
P63085;O54949;Q61532	17	10	880.82	0.416641	P63085|MK01_MOUSE Mitogen-activated protein kinase 1 OS=Mus musculus GN=Mapk1 PE=1 SV=3	2.73683e+06	1.14027e+06	2.41892e+06	989928	4	1
P63323	5	5	252.98	0.219184	P63323|RS12_MOUSE 40S ribosomal protein S12 OS=Mus musculus GN=Rps12 PE=1 SV=2	2.65006e+06	580851	2.34223e+06	504266	4	1
P68510	5	3	325.67	0.0642756	P68510|1433F_MOUSE 14-3-3 protein eta OS=Mus musculus GN=Ywhah PE=1 SV=2	1.03906e+06	66786.3	918365	57980.6	4	1
P97310	9	9	443.24	23.7868	P97310|MCM2_MOUSE DNA replication licensing factor MCM2 OS=Mus musculus GN=Mcm2 PE=1 SV=3	137394	3.26817e+06	121435	2.83727e+06	0	7
Q9CQF3	5	5	290.73	19.1389	Q9CQF3|CPSF5_MOUSE Cleavage and polyadenylation specificity factor subunit 5 OS=Mus musculus GN=Nudt21 PE=1 SV=1	224152	4.29002e+06	198115	3.72438e+06	0	3
Q3U1J4	5	5	229.67	0.124328	Q3U1J4|DDB1_MOUSE DNA damage-binding protein 1 OS=Mus musculus GN=Ddb1 PE=1 SV=2	805751	100177	712155	86968.7	5	0
Q6A4J8	5	5	193.25	0.286845	Q6A4J8|UBP7_MOUSE Ubiquitin carboxyl-terminal hydrolase 7 OS=Mus musculus GN=Usp7 PE=1 SV=1	4.86978e+06	1.39687e+06	4.30411e+06	1.21269e+06	4	1
Q8BTV2	5	5	418.79	18.5503	Q8BTV2|CPSF7_MOUSE Cleavage and polyadenylation specificity factor subunit 7 OS=Mus musculus GN=Cpsf7 PE=1 SV=2	109312	2.02776e+06	96614.2	1.7604e+06	0	6
Q6PCX7;Q7TQ32	4	4	200.6	0.755971	Q6PCX7|RGMA_MOUSE Repulsive guidance molecule A OS=Mus musculus GN=Rgma PE=1 SV=1	282604	213640	249776	185472	3	2
Q8BG05	4	3	252.87	0.181685	Q8BG05|ROA3_MOUSE Heterogeneous nuclear ribonucleoprotein A3 OS=Mus musculus GN=Hnrnpa3 PE=1 SV=1	1.37409e+06	249650	1.21447e+06	216734	3	2
Q8CIG8	5	5	324.16	0.0259762	Q8CIG8|ANM5_MOUSE Protein arginine N-methyltransferase 5 OS=Mus musculus GN=Prmt5 PE=1 SV=3	2.11621e+06	54970.9	1.87039e+06	47723	5	0
Q8QZY1	5	5	289.55	0.00197139	Q8QZY1|EIF3L_MOUSE Eukaryotic translation initiation factor 3 subunit L OS=Mus musculus GN=Eif3l PE=1 SV=1	1.51917e+06	2994.88	1.3427e+06	2600	5	0
Q9D1K7	4	4	197.03	0.0766543	Q9D1K7|CT027_MOUSE UPF0687 protein C20orf27 homolog OS=Mus musculus PE=1 SV=3	1.18383e+06	90745.6	1.04632e+06	78780.8	5	0
Q9D1M0	5	5	328.39	0.0406406	Q9D1M0|SEC13_MOUSE Protein SEC13 homolog OS=Mus musculus GN=Sec13 PE=1 SV=3	1.47348e+06	59883.1	1.30232e+06	51987.5	4	1
Q9Z1N5;Q8VDW0	4	4	238.2	0.0454916	Q9Z1N5|DX39B_MOUSE Spliceosome RNA helicase Ddx39b OS=Mus musculus GN=Ddx39b PE=1 SV=1	792877	36069.2	700777	31313.5	5	0
Q9Z1Z0	5	5	339.74	0.0239266	Q9Z1Z0|USO1_MOUSE General vesicular transport factor p115 OS=Mus musculus GN=Uso1 PE=1 SV=2	1.297e+06	31032.7	1.14634e+06	26941.1	5	0
Q91ZX7	4	4	214.35	0.010992	Q91ZX7|LRP1_MOUSE Prolow-density lipoprotein receptor-related protein 1 OS=Mus musculus GN=Lrp1 PE=1 SV=1	729473	8018.35	644737	6961.13	5	0
Q99KV1	6	6	373.83	0.0846162	Q99KV1|DJB11_MOUSE DnaJ homolog subfamily B member 11 OS=Mus musculus GN=Dnajb11 PE=1 SV=1	2.19298e+06	185562	1.93825e+06	161096	5	0
Q8CIT9	2	2	171.82	18.5426	Q8CIT9|SBSN_MOUSE Suprabasin OS=Mus musculus GN=Sbsn PE=2 SV=1	1.00657e+06	1.86644e+07	889645	1.62035e+07	1	7
Q60598	7	7	320.85	0.705904	Q60598|SRC8_MOUSE Src substrate cortactin OS=Mus musculus GN=Cttn PE=1 SV=2	485614	342797	429205	297599	4	1
Q61792	6	6	322.05	0.29895	Q61792|LASP1_MOUSE LIM and SH3 domain protein 1 OS=Mus musculus GN=Lasp1 PE=1 SV=1	785574	234847	694322	203883	4	1
Q9Z175	16	16	983.51	18.3837	Q9Z175|LOXL3_MOUSE Lysyl oxidase homolog 3 OS=Mus musculus GN=Loxl3 PE=2 SV=2	2.65552e+06	4.88182e+07	2.34706e+06	4.23816e+07	5	18
O55135	6	6	333.47	0.104345	O55135|IF6_MOUSE Eukaryotic translation initiation factor 6 OS=Mus musculus GN=Eif6 PE=1 SV=2	5.26309e+06	549175	4.65173e+06	476766	4	2
P12023;Q06335	8	8	347.87	0.970105	P12023|A4_MOUSE Amyloid beta A4 protein OS=Mus musculus GN=App PE=1 SV=3	1.40636e+06	1.36432e+06	1.243e+06	1.18444e+06	5	1
P26041;P26040	6	6	274.01	0.135752	P26041|MOES_MOUSE Moesin OS=Mus musculus GN=Msn PE=1 SV=3	2.56371e+06	348029	2.26591e+06	302141	6	0
P30416	5	5	234.14	0.178443	P30416|FKBP4_MOUSE Peptidyl-prolyl cis-trans isomerase FKBP4 OS=Mus musculus GN=Fkbp4 PE=1 SV=5	753315	134424	665810	116700	5	1
P32921	6	6	274.44	0.0742591	P32921|SYWC_MOUSE Tryptophan--tRNA ligase, cytoplasmic OS=Mus musculus GN=Wars PE=1 SV=2	1.18245e+06	87807.7	1.0451e+06	76230.3	6	0
P57776	6	5	434.56	0.107768	P57776|EF1D_MOUSE Elongation factor 1-delta OS=Mus musculus GN=Eef1d PE=1 SV=3	9.76509e+06	1.05236e+06	8.63078e+06	913609	5	1
P63005	5	5	221.7	0.207511	P63005|LIS1_MOUSE Platelet-activating factor acetylhydrolase IB subunit alpha OS=Mus musculus GN=Pafah1b1 PE=1 SV=2	1.26368e+06	262227	1.11689e+06	227652	4	2
Q3TXS7	6	6	305.23	0.0405229	Q3TXS7|PSMD1_MOUSE 26S proteasome non-ATPase regulatory subunit 1 OS=Mus musculus GN=Psmd1 PE=1 SV=1	506619	20529.7	447770	17822.8	6	0
Q6ZWX6	6	6	284.01	0.044486	Q6ZWX6|IF2A_MOUSE Eukaryotic translation initiation factor 2 subunit 1 OS=Mus musculus GN=Eif2s1 PE=1 SV=3	1.017e+06	45242.1	898862	39277	6	0
Q6ZQ58	6	6	360.57	17.0311	Q6ZQ58|LARP1_MOUSE La-related protein 1 OS=Mus musculus GN=Larp1 PE=1 SV=3	76177	1.29738e+06	67328.3	1.12632e+06	0	3
P32067;Q8CFW7	18	17	1364.1	16.6796	P32067|LA_MOUSE Lupus La protein homolog OS=Mus musculus GN=Ssb PE=1 SV=1	3.37111e+06	5.62288e+07	2.97953e+06	4.8815e+07	2	22
Q6NV83	4	4	262.79	15.9938	Q6NV83|SR140_MOUSE U2 snRNP-associated SURP motif-containing protein OS=Mus musculus GN=U2surp PE=1 SV=3	160360	2.56475e+06	141732	2.22659e+06	0	5
Q9CZX8	7	7	360.92	15.3013	Q9CZX8|RS19_MOUSE 40S ribosomal protein S19 OS=Mus musculus GN=Rps19 PE=1 SV=3	416484	6.37276e+06	368105	5.53252e+06	0	6
Q6NVF9	9	9	665.72	14.3326	Q6NVF9|CPSF6_MOUSE Cleavage and polyadenylation specificity factor subunit 6 OS=Mus musculus GN=Cpsf6 PE=1 SV=1	853897	1.22385e+07	754709	1.06249e+07	0	11
Q9EPL8	4	4	191.72	0.530321	Q9EPL8|IPO7_MOUSE Importin-7 OS=Mus musculus GN=Ipo7 PE=1 SV=2	1.13481e+06	601811	1.00299e+06	522463	4	2
P97461	5	5	438.71	13.9294	P97461|RS5_MOUSE 40S ribosomal protein S5 OS=Mus musculus GN=Rps5 PE=1 SV=3	267852	3.73102e+06	236738	3.23909e+06	0	4
Q99K48	14	11	987.95	13.663	Q99K48|NONO_MOUSE Non-POU domain-containing octamer-binding protein OS=Mus musculus GN=Nono PE=1 SV=3	1.76902e+06	2.41701e+07	1.56353e+06	2.09833e+07	3	18
Q91V92	6	5	323.19	0.142402	Q91V92|ACLY_MOUSE ATP-citrate synthase OS=Mus musculus GN=Acly PE=1 SV=1	562604	80115.9	497252	69552.6	6	0
Q91YR1	4	4	327.48	0.308273	Q91YR1|TWF1_MOUSE Twinfilin-1 OS=Mus musculus GN=Twf1 PE=1 SV=2	1.77854e+06	548275	1.57194e+06	475985	6	0
Q99MN1	6	6	285.54	0.219414	Q99MN1|SYK_MOUSE Lysine--tRNA ligase OS=Mus musculus GN=Kars PE=1 SV=1	2.26548e+06	497079	2.00233e+06	431539	6	0
Q64514	6	6	263.32	0.0162114	Q64514|TPP2_MOUSE Tripeptidyl-peptidase 2 OS=Mus musculus GN=Tpp2 PE=1 SV=3	665891	10795	588541	9371.72	6	0
Q61136	7	7	559.83	11.5299	Q61136|PRP4B_MOUSE Serine/threonine-protein kinase PRP4 homolog OS=Mus musculus GN=Prpf4b PE=1 SV=3	3.00211e+06	3.46139e+07	2.65338e+06	3.00501e+07	4	8
P17751	5	5	359.08	0.034482	P17751|TPIS_MOUSE Triosephosphate isomerase OS=Mus musculus GN=Tpi1 PE=1 SV=4	6.64401e+06	229099	5.87225e+06	198892	7	0
P24788;Q03173	4	4	135.88	10.8461	P24788|CD11B_MOUSE Cyclin-dependent kinase 11B OS=Mus musculus GN=Cdk11b PE=1 SV=2	190566	2.06689e+06	168430	1.79437e+06	0	3
P42208	7	7	499.1	0.214699	P42208|SEPT2_MOUSE Septin-2 OS=Mus musculus GN=Sept2 PE=1 SV=2	2.11426e+06	453928	1.86867e+06	394078	7	0
P61979	6	6	301.38	0.0723788	P61979|HNRPK_MOUSE Heterogeneous nuclear ribonucleoprotein K OS=Mus musculus GN=Hnrnpk PE=1 SV=1	928294	67188.8	820464	58330	6	1
Q9R118	7	7	316.59	10.7527	Q9R118|HTRA1_MOUSE Serine protease HTRA1 OS=Mus musculus GN=Htra1 PE=1 SV=2	189145	2.03382e+06	167174	1.76566e+06	2	7
P68254;O70456;O35239	8	5	530.82	0.129582	P68254|1433T_MOUSE 14-3-3 protein theta OS=Mus musculus GN=Ywhaq PE=1 SV=1	3.43372e+06	444947	3.03486e+06	386281	6	1
Q6P5F6	4	4	259.27	10.5168	Q6P5F6|S39AA_MOUSE Zinc transporter ZIP10 OS=Mus musculus GN=Slc39a10 PE=1 SV=1	1.57832e+06	1.6599e+07	1.39499e+06	1.44104e+07	2	7
Q04750;Q8R4U6	14	14	616.91	9.98526	Q04750|TOP1_MOUSE DNA topoisomerase 1 OS=Mus musculus GN=Top1 PE=1 SV=2	2.31362e+06	2.31021e+07	2.04487e+06	2.00561e+07	4	20
P99027	6	6	291.8	0.0134796	P99027|RLA2_MOUSE 60S acidic ribosomal protein P2 OS=Mus musculus GN=Rplp2 PE=1 SV=3	7.43088e+06	100165	6.56771e+06	86958.7	7	0
Q8BWR2	5	5	386.32	0.146668	Q8BWR2|PITH1_MOUSE PITH domain-containing protein 1 OS=Mus musculus GN=Pithd1 PE=1 SV=1	7.49767e+06	1.09967e+06	6.62674e+06	954676	6	1
Q6ZPZ3	4	4	177.52	9.7766	Q6ZPZ3|ZC3H4_MOUSE Zinc finger CCCH domain-containing protein 4 OS=Mus musculus GN=Zc3h4 PE=1 SV=2	198431	1.93998e+06	175381	1.68419e+06	1	3
Q9CQ65	7	7	423.51	0.018267	Q9CQ65|MTAP_MOUSE S-methyl-5'-thioadenosine phosphorylase OS=Mus musculus GN=Mtap PE=1 SV=1	3.35372e+06	61262.5	2.96415e+06	53185	6	1
Q8CG85	5	5	315.67	9.54698	Q8CG85|MAMC2_MOUSE MAM domain-containing protein 2 OS=Mus musculus GN=Mamdc2 PE=1 SV=1	139004	1.32707e+06	122858	1.1521e+06	2	5
Q62177	13	13	730.32	9.41982	Q62177|SEM3B_MOUSE Semaphorin-3B OS=Mus musculus GN=Sema3b PE=2 SV=2	2.82486e+06	2.66097e+07	2.49673e+06	2.31012e+07	6	17
Q9ERK4	8	7	397.22	0.0591453	Q9ERK4|XPO2_MOUSE Exportin-2 OS=Mus musculus GN=Cse1l PE=1 SV=1	1.24674e+06	73738.8	1.10192e+06	64016.3	6	1
Q02819	24	23	1877.53	9.18615	Q02819|NUCB1_MOUSE Nucleobindin-1 OS=Mus musculus GN=Nucb1 PE=1 SV=2	1.03675e+07	9.52373e+07	9.1632e+06	8.26803e+07	13	38
P02469;Q9D659	23	23	1559.58	9.01709	P02469|LAMB1_MOUSE Laminin subunit beta-1 OS=Mus musculus GN=Lamb1 PE=1 SV=3	3.93872e+06	3.55158e+07	3.4812e+06	3.0833e+07	10	27
Q61598	8	7	416.24	0.0444148	Q61598|GDIB_MOUSE Rab GDP dissociation inhibitor beta OS=Mus musculus GN=Gdi2 PE=1 SV=1	4.44306e+06	197338	3.92696e+06	171319	7	0
Q93092	6	6	256.89	0.173392	Q93092|TALDO_MOUSE Transaldolase OS=Mus musculus GN=Taldo1 PE=1 SV=2	2.90654e+06	503969	2.56891e+06	437521	6	1
P97868	4	4	289.21	8.15315	P97868|RBBP6_MOUSE E3 ubiquitin-protein ligase RBBP6 OS=Mus musculus GN=Rbbp6 PE=1 SV=5	446513	3.64049e+06	394646	3.16049e+06	1	6
P14069	4	4	170.09	0.0980045	P14069|S10A6_MOUSE Protein S100-A6 OS=Mus musculus GN=S100a6 PE=1 SV=3	4.81199e+07	4.71597e+06	4.25303e+07	4.09417e+06	6	2
Q8VIJ6	27	23	1638.44	7.74788	Q8VIJ6|SFPQ_MOUSE Splicing factor, proline- and glutamine-rich OS=Mus musculus GN=Sfpq PE=1 SV=1	1.10034e+07	8.52527e+07	9.72521e+06	7.40122e+07	6	24
Q8R2G6	10	10	503.61	7.69781	Q8R2G6|CCD80_MOUSE Coiled-coil domain-containing protein 80 OS=Mus musculus GN=Ccdc80 PE=1 SV=2	3.49081e+06	2.68716e+07	3.08532e+06	2.33286e+07	3	9
P47941	10	9	764.65	0.211594	P47941|CRKL_MOUSE Crk-like protein OS=Mus musculus GN=Crkl PE=1 SV=2	1.11965e+07	2.3691e+06	9.89588e+06	2.05673e+06	8	0
P62259	8	6	536.54	0.02853	P62259|1433E_MOUSE 14-3-3 protein epsilon OS=Mus musculus GN=Ywhae PE=1 SV=1	5.77812e+06	164850	5.10693e+06	143114	8	0
Q6P5F9	6	6	312.59	0.441824	Q6P5F9|XPO1_MOUSE Exportin-1 OS=Mus musculus GN=Xpo1 PE=1 SV=1	828183	365911	731982	317666	8	0
Q8BJD1	5	5	218.47	7.6754	Q8BJD1|ITIH5_MOUSE Inter-alpha-trypsin inhibitor heavy chain H5 OS=Mus musculus GN=Itih5 PE=1 SV=1	207075	1.58938e+06	183021	1.37982e+06	1	5
P35441	25	25	1474.61	7.66427	P35441|TSP1_MOUSE Thrombospondin-1 OS=Mus musculus GN=Thbs1 PE=1 SV=1	5.88085e+06	4.50724e+07	5.19773e+06	3.91296e+07	13	26
Q9CXY6	7	7	393.32	0.148742	Q9CXY6|ILF2_MOUSE Interleukin enhancer-binding factor 2 OS=Mus musculus GN=Ilf2 PE=1 SV=1	1.37827e+06	205008	1.21817e+06	177977	7	1
Q9CZD3	7	7	340.27	0.213694	Q9CZD3|SYG_MOUSE Glycine--tRNA ligase OS=Mus musculus GN=Gars PE=1 SV=1	1.59531e+06	340908	1.41e+06	295960	7	1
Q9D662	10	9	584.95	0.107372	Q9D662|SC23B_MOUSE Protein transport protein Sec23B OS=Mus musculus GN=Sec23b PE=1 SV=1	2.55195e+06	274008	2.25551e+06	237880	8	0
O35286;A2A4P0	13	13	530.43	7.31729	O35286|DHX15_MOUSE Pre-mRNA-splicing factor ATP-dependent RNA helicase DHX15 OS=Mus musculus GN=Dhx15 PE=1 SV=2	794629	5.81453e+06	702325	5.04789e+06	1	11
Q01853;Q3UMC0	8	8	430.21	4.12899	Q01853|TERA_MOUSE Transitional endoplasmic reticulum ATPase OS=Mus musculus GN=Vcp PE=1 SV=4	4.31049e+06	1.7798e+07	3.80979e+06	1.54513e+07	8	0
Q62433	7	7	406.97	0.221535	Q62433|NDRG1_MOUSE Protein NDRG1 OS=Mus musculus GN=Ndrg1 PE=1 SV=1	4.45478e+06	986890	3.93731e+06	856769	7	1
Q64674	8	8	321.73	0.0566733	Q64674|SPEE_MOUSE Spermidine synthase OS=Mus musculus GN=Srm PE=1 SV=1	4.6351e+06	262687	4.09669e+06	228051	8	0
Q920B9	4	4	201.03	7.15968	Q920B9|SP16H_MOUSE FACT complex subunit SPT16 OS=Mus musculus GN=Supt16h PE=1 SV=2	239951	1.71797e+06	212079	1.49146e+06	0	3
O70133	9	9	478.4	0.018598	O70133|DHX9_MOUSE ATP-dependent RNA helicase A OS=Mus musculus GN=Dhx9 PE=1 SV=2	3.05894e+06	56890.3	2.70361e+06	49389.3	9	0
Q3UQ28	41	41	3046.33	7.09307	Q3UQ28|PXDN_MOUSE Peroxidasin homolog OS=Mus musculus GN=Pxdn PE=1 SV=2	2.26007e+07	1.60308e+08	1.99754e+07	1.39172e+08	26	61
Q00731	8	8	421.35	7.06564	Q00731|VEGFA_MOUSE Vascular endothelial growth factor A OS=Mus musculus GN=Vegfa PE=2 SV=2	1.10551e+07	7.81115e+07	9.77097e+06	6.78126e+07	4	11
P30275;Q6P8J7	11	11	508.54	0.238683	P30275|KCRU_MOUSE Creatine kinase U-type, mitochondrial OS=Mus musculus GN=Ckmt1 PE=1 SV=1	3.92916e+06	937822	3.47275e+06	814171	8	1
P40124	7	7	503.79	0.113937	P40124|CAP1_MOUSE Adenylyl cyclase-associated protein 1 OS=Mus musculus GN=Cap1 PE=1 SV=4	1.99502e+06	227307	1.76328e+06	197336	8	1
P49312;Q9CX86	8	6	537.43	0.061879	P49312|ROA1_MOUSE Heterogeneous nuclear ribonucleoprotein A1 OS=Mus musculus GN=Hnrnpa1 PE=1 SV=2	7.07608e+06	437861	6.25412e+06	380129	9	0
Q8R081	20	20	1179.41	6.54125	Q8R081|HNRPL_MOUSE Heterogeneous nuclear ribonucleoprotein L OS=Mus musculus GN=Hnrnpl PE=1 SV=2	2.93117e+06	1.91735e+07	2.59068e+06	1.66455e+07	4	16
P70168	9	9	468.69	0.0155191	P70168|IMB1_MOUSE Importin subunit beta-1 OS=Mus musculus GN=Kpnb1 PE=1 SV=2	2.33664e+06	36262.5	2.06521e+06	31481.3	9	0
P97333	28	28	1842.95	6.20822	P97333|NRP1_MOUSE Neuropilin-1 OS=Mus musculus GN=Nrp1 PE=1 SV=2	3.10504e+07	1.92768e+08	2.74436e+07	1.67352e+08	22	45
Q9EQH3	10	10	462.62	2.35619	Q9EQH3|VPS35_MOUSE Vacuolar protein sorting-associated protein 35 OS=Mus musculus GN=Vps35 PE=1 SV=1	4.07217e+07	9.5948e+07	3.59915e+07	8.32973e+07	9	0
Q9R1C7;Q80W14	4	4	317.58	5.94897	Q9R1C7|PR40A_MOUSE Pre-mRNA-processing factor 40 homolog A OS=Mus musculus GN=Prpf40a PE=1 SV=1	594063	3.53406e+06	525057	3.0681e+06	2	4
Q9QUR6	9	9	620.36	0.133486	Q9QUR6|PPCE_MOUSE Prolyl endopeptidase OS=Mus musculus GN=Prep PE=1 SV=1	3.41176e+06	455421	3.01545e+06	395374	9	0
O35657	3	3	132.29	5.80323	O35657|NEUR1_MOUSE Sialidase-1 OS=Mus musculus GN=Neu1 PE=1 SV=1	101068	586523	89328.3	509190	0	3
Q9WVG6	10	10	433.01	0.0098978	Q9WVG6|CARM1_MOUSE Histone-arginine methyltransferase CARM1 OS=Mus musculus GN=Carm1 PE=1 SV=2	4.79371e+06	47447.2	4.23688e+06	41191.3	9	0
Q91ZJ5	9	9	384.74	0.0551555	Q91ZJ5|UGPA_MOUSE UTP--glucose-1-phosphate uridylyltransferase OS=Mus musculus GN=Ugp2 PE=1 SV=3	2.60829e+06	143861	2.30531e+06	124893	9	0
P28653	6	6	311.9	5.71799	P28653|PGS1_MOUSE Biglycan OS=Mus musculus GN=Bgn PE=1 SV=1	817574	4.67487e+06	722605	4.05849e+06	2	7
Q61171	4	4	195.64	0.0345809	Q61171|PRDX2_MOUSE Peroxiredoxin-2 OS=Mus musculus GN=Prdx2 PE=1 SV=3	1.33201e+07	460622	1.17729e+07	399889	7	2
P62267	5	5	281.79	5.43914	P62267|RS23_MOUSE 40S ribosomal protein S23 OS=Mus musculus GN=Rps23 PE=1 SV=3	258451	1.40575e+06	228429	1.2204e+06	0	3
Q9WUU7	3	3	282.44	5.03848	Q9WUU7|CATZ_MOUSE Cathepsin Z OS=Mus musculus GN=Ctsz PE=1 SV=1	1.27337e+06	6.41583e+06	1.12545e+06	5.56991e+06	3	4
Q8CG19	43	42	3681.99	4.96249	Q8CG19|LTBP1_MOUSE Latent-transforming growth factor beta-binding protein 1 OS=Mus musculus GN=Ltbp1 PE=1 SV=2	7.15768e+07	3.55199e+08	6.32624e+07	3.08366e+08	33	84
Q9D1A2	8	8	698.84	0.0380481	Q9D1A2|CNDP2_MOUSE Cytosolic non-specific dipeptidase OS=Mus musculus GN=Cndp2 PE=1 SV=1	6.43974e+06	245020	5.6917e+06	212714	8	2
B2RY56	6	5	308.73	4.84547	B2RY56|RBM25_MOUSE RNA-binding protein 25 OS=Mus musculus GN=Rbm25 PE=1 SV=2	871838	4.22447e+06	770565	3.66747e+06	4	5
Q62465	8	8	525.17	0.144223	Q62465|VAT1_MOUSE Synaptic vesicle membrane protein VAT-1 homolog OS=Mus musculus GN=Vat1 PE=1 SV=3	5.23046e+06	754354	4.62289e+06	654893	8	2
P25444	5	5	254.26	4.37193	P25444|RS2_MOUSE 40S ribosomal protein S2 OS=Mus musculus GN=Rps2 PE=1 SV=3	155966	681870	137849	591966	3	5
Q61810	3	2	176.58	4.34927	Q61810|LTBP3_MOUSE Latent-transforming growth factor beta-binding protein 3 OS=Mus musculus GN=Ltbp3 PE=1 SV=3	111509	484984	98556.6	421039	1	3
Q924C6	4	4	264.27	3.5588	Q924C6|LOXL4_MOUSE Lysyl oxidase homolog 4 OS=Mus musculus GN=Loxl4 PE=2 SV=2	297267	1.05791e+06	262736	918428	2	3
Q9DC23	16	16	826.83	3.53402	Q9DC23|DJC10_MOUSE DnaJ homolog subfamily C member 10 OS=Mus musculus GN=Dnajc10 PE=1 SV=2	7.81736e+06	2.76267e+07	6.9093e+06	2.39841e+07	13	5
Q7TNC4	7	3	417.04	3.45952	Q7TNC4|LC7L2_MOUSE Putative RNA-binding protein Luc7-like 2 OS=Mus musculus GN=Luc7l2 PE=1 SV=1	320467	1.10866e+06	283242	962485	2	4
P10605	6	6	713.69	3.40798	P10605|CATB_MOUSE Cathepsin B OS=Mus musculus GN=Ctsb PE=1 SV=2	2.36081e+07	8.04561e+07	2.08658e+07	6.9848e+07	13	16
P24270;Q8BI29	13	13	624.93	0.381112	P24270|CATA_MOUSE Catalase OS=Mus musculus GN=Cat PE=1 SV=4	2.05702e+06	783954	1.81808e+06	680590	9	2
P62702	13	13	792.55	3.00831	P62702|RS4X_MOUSE 40S ribosomal protein S4, X isoform OS=Mus musculus GN=Rps4x PE=1 SV=2	1.4758e+06	4.43967e+06	1.30437e+06	3.8543e+06	0	7
P02535	13	5	814.01	2.96301	P02535|K1C10_MOUSE Keratin, type I cytoskeletal 10 OS=Mus musculus GN=Krt10 PE=1 SV=3	8.48903e+06	2.51531e+07	7.50295e+06	2.18367e+07	5	6
P68040	5	5	245.91	2.71777	P68040|RACK1_MOUSE Receptor of activated protein C kinase 1 OS=Mus musculus GN=Rack1 PE=1 SV=3	875185	2.37855e+06	773524	2.06494e+06	5	4
P04202	9	9	523.24	2.67554	P04202|TGFB1_MOUSE Transforming growth factor beta-1 OS=Mus musculus GN=Tgfb1 PE=1 SV=1	6.10987e+06	1.63472e+07	5.40015e+06	1.41918e+07	7	4
Q6ZWY9;Q64524;P70696	5	5	402.68	0.0797908	Q6ZWY9|H2B1C_MOUSE Histone H2B type 1-C/E/G OS=Mus musculus GN=Hist1h2bc PE=1 SV=3	3.48917e+07	2.78404e+06	3.08387e+07	2.41696e+06	10	1
Q9D819	7	7	453.97	0.27145	Q9D819|IPYR_MOUSE Inorganic pyrophosphatase OS=Mus musculus GN=Ppa1 PE=1 SV=1	1.07913e+07	2.9293e+06	9.53781e+06	2.54308e+06	11	0
Q9DBT5;O08739;Q3U0M1	11	11	450.52	0.148477	Q9DBT5|AMPD2_MOUSE AMP deaminase 2 OS=Mus musculus GN=Ampd2 PE=1 SV=1	3.36667e+06	499873	2.9756e+06	433965	11	0
Q3TTY5	9	6	447.62	2.65015	Q3TTY5|K22E_MOUSE Keratin, type II cytoskeletal 2 epidermal OS=Mus musculus GN=Krt2 PE=1 SV=1	3.19486e+06	8.46684e+06	2.82374e+06	7.35049e+06	2	3
Q61205	10	9	479.85	2.63996	Q61205|PA1B3_MOUSE Platelet-activating factor acetylhydrolase IB subunit gamma OS=Mus musculus GN=Pafah1b3 PE=1 SV=1	1.8519e+06	4.88894e+06	1.63678e+06	4.24434e+06	3	8
P70428	3	3	138.79	2.56866	P70428|EXT2_MOUSE Exostosin-2 OS=Mus musculus GN=Ext2 PE=1 SV=2	304147	781248	268817	678241	0	3
Q640N1	6	6	346.18	2.41638	Q640N1|AEBP1_MOUSE Adipocyte enhancer-binding protein 1 OS=Mus musculus GN=Aebp1 PE=1 SV=1	1.85799e+06	4.48961e+06	1.64217e+06	3.89765e+06	3	6
Q61477	2	2	145.78	2.39676	Q61477|NBL1_MOUSE Neuroblastoma suppressor of tumorigenicity 1 OS=Mus musculus GN=Nbl1 PE=1 SV=2	1.48277e+06	3.55385e+06	1.31053e+06	3.08527e+06	4	5
P10493	33	32	2608.37	2.28051	P10493|NID1_MOUSE Nidogen-1 OS=Mus musculus GN=Nid1 PE=1 SV=2	1.82062e+08	4.15194e+08	1.60914e+08	3.60451e+08	56	66
Q62261;P15508	11	11	706.38	0.014269	Q62261|SPTB2_MOUSE Spectrin beta chain, non-erythrocytic 1 OS=Mus musculus GN=Sptbn1 PE=1 SV=2	1.66718e+06	23789.1	1.47352e+06	20652.5	11	0
Q61164;A2APF3	3	3	122.07	1.96224	Q61164|CTCF_MOUSE Transcriptional repressor CTCF OS=Mus musculus GN=Ctcf PE=1 SV=2	442316	867931	390937	753494	0	3
Q99PV0	6	6	342.41	1.85885	Q99PV0|PRP8_MOUSE Pre-mRNA-processing-splicing factor 8 OS=Mus musculus GN=Prpf8 PE=1 SV=2	276980	514864	244806	446980	5	3
P54822	8	8	533.64	0.0617692	P54822|PUR8_MOUSE Adenylosuccinate lyase OS=Mus musculus GN=Adsl PE=1 SV=2	8.54952e+06	528097	7.55641e+06	458468	10	2
P80316	10	9	661.61	0.186042	P80316|TCPE_MOUSE T-complex protein 1 subunit epsilon OS=Mus musculus GN=Cct5 PE=1 SV=1	3.79954e+06	706873	3.35819e+06	613672	11	1
P80317;Q61390	12	12	734.07	0.102	P80317|TCPZ_MOUSE T-complex protein 1 subunit zeta OS=Mus musculus GN=Cct6a PE=1 SV=3	5.35574e+06	546283	4.73362e+06	474256	10	2
P22682;Q3TTA7	8	8	550.76	1.62029	P22682|CBL_MOUSE E3 ubiquitin-protein ligase CBL OS=Mus musculus GN=Cbl PE=1 SV=3	4.55834e+06	7.38583e+06	4.02885e+06	6.41201e+06	5	4
Q7TPR4;Q9JI91	28	13	1604.95	0.147811	Q7TPR4|ACTN1_MOUSE Alpha-actinin-1 OS=Mus musculus GN=Actn1 PE=1 SV=1	6.89956e+06	1.01983e+06	6.09811e+06	885365	12	0
Q8BUV3	16	16	941.6	0.113181	Q8BUV3|GEPH_MOUSE Gephyrin OS=Mus musculus GN=Gphn PE=1 SV=2	9.28653e+06	1.05106e+06	8.20781e+06	912478	12	0
Q61937	4	4	386.28	1.53316	Q61937|NPM_MOUSE Nucleophosmin OS=Mus musculus GN=Npm1 PE=1 SV=1	1.6001e+06	2.45322e+06	1.41424e+06	2.12976e+06	5	6
Q9D1Q6;Q7TN58	9	8	540.58	0.281132	Q9D1Q6|ERP44_MOUSE Endoplasmic reticulum resident protein 44 OS=Mus musculus GN=Erp44 PE=1 SV=1	1.45234e+07	4.08299e+06	1.28364e+07	3.54465e+06	11	1
P04104;Q6IFZ6	9	3	705.47	1.48972	P04104|K2C1_MOUSE Keratin, type II cytoskeletal 1 OS=Mus musculus GN=Krt1 PE=1 SV=4	9.78622e+06	1.45787e+07	8.64946e+06	1.26565e+07	4	4
O35887	22	22	1644.48	1.39455	O35887|CALU_MOUSE Calumenin OS=Mus musculus GN=Calu PE=1 SV=1	4.23571e+06	5.90692e+06	3.74369e+06	5.1281e+06	3	3
Q06890	6	5	327.83	1.37673	Q06890|CLUS_MOUSE Clusterin OS=Mus musculus GN=Clu PE=1 SV=1	4.65083e+06	6.40291e+06	4.11059e+06	5.55869e+06	6	5
P80315	12	11	844.75	0.118824	P80315|TCPD_MOUSE T-complex protein 1 subunit delta OS=Mus musculus GN=Cct4 PE=1 SV=3	5.75241e+06	683524	5.08421e+06	593402	13	0
P10126;P62631	10	9	662.14	1.37167	P10126|EF1A1_MOUSE Elongation factor 1-alpha 1 OS=Mus musculus GN=Eef1a1 PE=1 SV=3	5.89631e+06	8.08779e+06	5.2114e+06	7.02142e+06	12	8
O35344	4	4	174.47	1.30948	O35344|IMA4_MOUSE Importin subunit alpha-4 OS=Mus musculus GN=Kpna3 PE=1 SV=1	256069	335319	226324	291107	1	3
Q9EQS3	2	2	180.11	1.26013	Q9EQS3|MYCBP_MOUSE C-Myc-binding protein OS=Mus musculus GN=Mycbp PE=1 SV=5	1.35073e+06	1.7021e+06	1.19383e+06	1.47768e+06	4	3
P97471;P15919	5	5	343.5	1.2453	P97471|SMAD4_MOUSE Mothers against decapentaplegic homolog 4 OS=Mus musculus GN=Smad4 PE=1 SV=2	772806	962372	683037	835484	5	6
P80313	11	11	628.62	0.137158	P80313|TCPH_MOUSE T-complex protein 1 subunit eta OS=Mus musculus GN=Cct7 PE=1 SV=1	6.87884e+06	943485	6.0798e+06	819087	12	2
Q6P5E4	15	15	754.36	0.145076	Q6P5E4|UGGG1_MOUSE UDP-glucose:glycoprotein glucosyltransferase 1 OS=Mus musculus GN=Uggt1 PE=1 SV=4	4.12854e+06	598951	3.64897e+06	519980	13	1
Q9R0E2	12	12	631.86	0.0458381	Q9R0E2|PLOD1_MOUSE Procollagen-lysine,2-oxoglutarate 5-dioxygenase 1 OS=Mus musculus GN=Plod1 PE=1 SV=1	7.28743e+06	334042	6.44093e+06	289999	12	2
Q922R8	7	7	700.71	0.164648	Q922R8|PDIA6_MOUSE Protein disulfide-isomerase A6 OS=Mus musculus GN=Pdia6 PE=1 SV=3	1.72434e+07	2.83911e+06	1.52405e+07	2.46477e+06	12	2
P26443	8	8	482.48	1.18474	P26443|DHE3_MOUSE Glutamate dehydrogenase 1, mitochondrial OS=Mus musculus GN=Glud1 PE=1 SV=1	1.75056e+06	2.07395e+06	1.54721e+06	1.8005e+06	6	5
O89017	9	9	878.89	1.15013	O89017|LGMN_MOUSE Legumain OS=Mus musculus GN=Lgmn PE=1 SV=1	5.9402e+07	6.83201e+07	5.25019e+07	5.93121e+07	17	15
P81117	8	8	669.58	1.12525	P81117|NUCB2_MOUSE Nucleobindin-2 OS=Mus musculus GN=Nucb2 PE=1 SV=2	1.68123e+07	1.89181e+07	1.48594e+07	1.64237e+07	10	7
Q9CQ01	5	5	446.84	0.0518565	Q9CQ01|RNT2_MOUSE Ribonuclease T2 OS=Mus musculus GN=Rnaset2 PE=1 SV=1	2.25646e+07	1.17012e+06	1.99435e+07	1.01584e+06	13	2
P02468;E9Q5R7	8	8	450.21	1.07931	P02468|LAMC1_MOUSE Laminin subunit gamma-1 OS=Mus musculus GN=Lamc1 PE=1 SV=2	1.26469e+06	1.36499e+06	1.11778e+06	1.18502e+06	6	4
P17742	10	10	655.22	0.507145	P17742|PPIA_MOUSE Peptidyl-prolyl cis-trans isomerase A OS=Mus musculus GN=Ppia PE=1 SV=2	2.15217e+07	1.09146e+07	1.90218e+07	9.47556e+06	14	2
P80314	13	13	1089.2	0.176253	P80314|TCPB_MOUSE T-complex protein 1 subunit beta OS=Mus musculus GN=Cct2 PE=1 SV=4	9.9236e+06	1.74907e+06	8.77088e+06	1.51845e+06	15	1
Q3V1L4	13	13	710.39	0.352706	Q3V1L4|5NTC_MOUSE Cytosolic purine 5'-nucleotidase OS=Mus musculus GN=Nt5c2 PE=1 SV=2	1.05681e+07	3.72743e+06	9.3405e+06	3.23597e+06	14	2
Q6ZQ38	15	15	907.81	0.0214494	Q6ZQ38|CAND1_MOUSE Cullin-associated NEDD8-dissociated protein 1 OS=Mus musculus GN=Cand1 PE=1 SV=2	6.62357e+06	142072	5.85418e+06	123339	16	0
P16858;Q64467	11	11	667.5	1.00037	P16858|G3P_MOUSE Glyceraldehyde-3-phosphate dehydrogenase OS=Mus musculus GN=Gapdh PE=1 SV=2	1.33375e+07	1.33424e+07	1.17882e+07	1.15833e+07	9	10
Q3U4G3	9	9	587.06	0.928008	Q3U4G3|XXLT1_MOUSE Xyloside xylosyltransferase 1 OS=Mus musculus GN=Xxylt1 PE=1 SV=2	5.63843e+06	5.23251e+06	4.98347e+06	4.5426e+06	8	7
P10923	3	3	189.42	0.924436	P10923|OSTP_MOUSE Osteopontin OS=Mus musculus GN=Spp1 PE=1 SV=1	3.96605e+06	3.66636e+06	3.50536e+06	3.18295e+06	2	3
P55302;Q80VP0	9	9	496.88	0.0243445	P55302|AMRP_MOUSE Alpha-2-macroglobulin receptor-associated protein OS=Mus musculus GN=Lrpap1 PE=1 SV=1	6.35859e+07	1.54797e+06	5.61998e+07	1.34387e+06	17	1
P57780;O88990	32	17	2013.05	0.0413787	P57780|ACTN4_MOUSE Alpha-actinin-4 OS=Mus musculus GN=Actn4 PE=1 SV=1	1.14564e+07	474051	1.01256e+07	411548	18	0
P22777	6	6	434.79	0.907936	P22777|PAI1_MOUSE Plasminogen activator inhibitor 1 OS=Mus musculus GN=Serpine1 PE=1 SV=1	7.42163e+06	6.73837e+06	6.55954e+06	5.84991e+06	7	7
P08003	15	15	891.62	0.0788328	P08003|PDIA4_MOUSE Protein disulfide-isomerase A4 OS=Mus musculus GN=Pdia4 PE=1 SV=3	1.93031e+07	1.52172e+06	1.70609e+07	1.32108e+06	17	2
Q9EPL2;Q9ER65	17	16	1025.87	0.895181	Q9EPL2|CSTN1_MOUSE Calsyntenin-1 OS=Mus musculus GN=Clstn1 PE=1 SV=1	1.30202e+07	1.16554e+07	1.15078e+07	1.01187e+07	16	12
Q99PM3	4	4	308.4	0.826885	Q99PM3|TF2AA_MOUSE Transcription initiation factor IIA subunit 1 OS=Mus musculus GN=Gtf2a1 PE=2 SV=2	1.89028e+07	1.56304e+07	1.6707e+07	1.35695e+07	7	4
Q80X90	27	24	1619.65	2.25858	Q80X90|FLNB_MOUSE Filamin-B OS=Mus musculus GN=Flnb PE=1 SV=3	2.65398e+08	5.99423e+08	2.34569e+08	5.20389e+08	19	0
Q99KQ4	17	17	1020.25	0.0527375	Q99KQ4|NAMPT_MOUSE Nicotinamide phosphoribosyltransferase OS=Mus musculus GN=Nampt PE=1 SV=1	7.11731e+06	375349	6.29057e+06	325860	18	1
Q61543	24	24	1660.03	0.796136	Q61543|GSLG1_MOUSE Golgi apparatus protein 1 OS=Mus musculus GN=Glg1 PE=1 SV=1	7.94464e+06	6.32501e+06	7.0218e+06	5.49106e+06	22	19
Q9DCT8	5	5	304.3	0.795479	Q9DCT8|CRIP2_MOUSE Cysteine-rich protein 2 OS=Mus musculus GN=Crip2 PE=1 SV=1	5.9209e+06	4.70995e+06	5.23313e+06	4.08895e+06	3	3
Q64191	4	4	257.79	0.769559	Q64191|ASPG_MOUSE N(4)-(beta-N-acetylglucosaminyl)-L-asparaginase OS=Mus musculus GN=Aga PE=1 SV=1	2.23833e+07	1.72253e+07	1.97833e+07	1.49542e+07	4	6
Q8QZY9	6	6	598.28	0.767327	Q8QZY9|SF3B4_MOUSE Splicing factor 3B subunit 4 OS=Mus musculus GN=Sf3b4 PE=1 SV=1	8.62883e+06	6.62113e+06	7.62651e+06	5.74814e+06	5	8
O08810	13	13	667.48	0.675303	O08810|U5S1_MOUSE 116 kDa U5 small nuclear ribonucleoprotein component OS=Mus musculus GN=Eftud2 PE=1 SV=1	2.1026e+06	1.41989e+06	1.85836e+06	1.23268e+06	11	7
P60710;Q8BFZ3	17	8	1308	0.621498	P60710|ACTB_MOUSE Actin, cytoplasmic 1 OS=Mus musculus GN=Actb PE=1 SV=1	2.36238e+07	1.46821e+07	2.08797e+07	1.27463e+07	13	10
Q9CY58	16	16	1198.51	0.611823	Q9CY58|PAIRB_MOUSE Plasminogen activator inhibitor 1 RNA-binding protein OS=Mus musculus GN=Serbp1 PE=1 SV=2	6.4201e+06	3.92797e+06	5.67434e+06	3.41007e+06	7	3
Q61001	18	18	1098.08	0.600985	Q61001|LAMA5_MOUSE Laminin subunit alpha-5 OS=Mus musculus GN=Lama5 PE=1 SV=4	7.1112e+06	4.27372e+06	6.28517e+06	3.71023e+06	17	12
Q9QUN9	5	4	371.32	0.531089	Q9QUN9|DKK3_MOUSE Dickkopf-related protein 3 OS=Mus musculus GN=Dkk3 PE=2 SV=1	5.99922e+06	3.18612e+06	5.30236e+06	2.76603e+06	2	4
O08807	6	3	335.44	0.509623	O08807|PRDX4_MOUSE Peroxiredoxin-4 OS=Mus musculus GN=Prdx4 PE=1 SV=1	1.92476e+06	980903	1.70118e+06	851571	4	3
Q68FD5	20	19	1298.47	0.0880539	Q68FD5|CLH1_MOUSE Clathrin heavy chain 1 OS=Mus musculus GN=Cltc PE=1 SV=3	7.51829e+06	662015	6.64497e+06	574729	23	0
Q9R020	2	2	208.21	0.49323	Q9R020|ZRAB2_MOUSE Zinc finger Ran-binding domain-containing protein 2 OS=Mus musculus GN=Zranb2 PE=1 SV=2	186500	91987.5	164836	79859	0	3
Q80ZM7	3	3	272.63	0.46231	Q80ZM7|T2AG_MOUSE Transcription initiation factor IIA subunit 2 OS=Mus musculus GN=Gtf2a2 PE=1 SV=2	1.96254e+06	907301	1.73457e+06	787674	4	3
Q05793	99	98	7922.73	0.45953	Q05793|PGBM_MOUSE Basement membrane-specific heparan sulfate proteoglycan core protein OS=Mus musculus GN=Hspg2 PE=1 SV=1	1.04298e+09	4.79283e+08	9.21832e+08	4.16089e+08	237	154
P99024;P68372;Q7TMM9;Q9D6F9;Q9ERD7;Q922F4;A2AQ07	10	10	466.91	0.427435	P99024|TBB5_MOUSE Tubulin beta-5 chain OS=Mus musculus GN=Tubb5 PE=1 SV=1	2.87588e+06	1.22925e+06	2.54182e+06	1.06717e+06	9	4
Q8BKC5	19	19	1250	0.0249352	Q8BKC5|IPO5_MOUSE Importin-5 OS=Mus musculus GN=Ipo5 PE=1 SV=3	1.4481e+07	361086	1.27989e+07	313477	23	1
Q9Z1X4;Q91WM1	12	12	648.02	0.370815	Q9Z1X4|ILF3_MOUSE Interleukin enhancer-binding factor 3 OS=Mus musculus GN=Ilf3 PE=1 SV=2	2.33146e+06	864542	2.06064e+06	750553	7	4
P20152;P15331;P31001	14	13	810.19	0.37059	P20152|VIME_MOUSE Vimentin OS=Mus musculus GN=Vim PE=1 SV=3	3.96302e+06	1.46865e+06	3.50268e+06	1.27501e+06	7	4
Q921M3	20	20	1143.4	0.299203	Q921M3|SF3B3_MOUSE Splicing factor 3B subunit 3 OS=Mus musculus GN=Sf3b3 PE=1 SV=1	7.34309e+06	2.19707e+06	6.49012e+06	1.90739e+06	19	6
Q9QXT0	13	13	1212.63	0.0221713	Q9QXT0|CNPY2_MOUSE Protein canopy homolog 2 OS=Mus musculus GN=Cnpy2 PE=1 SV=1	4.39969e+07	975468	3.88862e+07	846853	24	1
Q9D8N0	9	8	520.79	0.2906	Q9D8N0|EF1G_MOUSE Elongation factor 1-gamma OS=Mus musculus GN=Eef1g PE=1 SV=3	5.42876e+06	1.5776e+06	4.79816e+06	1.36959e+06	7	5
P16045	4	4	367.41	0.289216	P16045|LEG1_MOUSE Galectin-1 OS=Mus musculus GN=Lgals1 PE=1 SV=3	1.5414e+07	4.45796e+06	1.36235e+07	3.87018e+06	5	3
Q8VHY0	33	33	2192.81	0.276994	Q8VHY0|CSPG4_MOUSE Chondroitin sulfate proteoglycan 4 OS=Mus musculus GN=Cspg4 PE=1 SV=3	6.92127e+07	1.91715e+07	6.1173e+07	1.66437e+07	30	21
Q9Z2X1	8	7	640.43	0.27622	Q9Z2X1|HNRPF_MOUSE Heterogeneous nuclear ribonucleoprotein F OS=Mus musculus GN=Hnrnpf PE=1 SV=3	5.97256e+06	1.64974e+06	5.27879e+06	1.43222e+06	8	5
P11276	64	63	4629.6	0.251206	P11276|FINC_MOUSE Fibronectin OS=Mus musculus GN=Fn1 PE=1 SV=4	2.78267e+08	6.99023e+07	2.45943e+08	6.06857e+07	110	39
P05064;P05063;Q91Y97	19	19	1375.91	0.0300952	P05064|ALDOA_MOUSE Fructose-bisphosphate aldolase A OS=Mus musculus GN=Aldoa PE=1 SV=2	3.08219e+07	927594	2.72417e+07	805291	28	1
P63242;Q8BGY2	12	12	1209.31	0.248763	P63242|IF5A1_MOUSE Eukaryotic translation initiation factor 5A-1 OS=Mus musculus GN=Eif5a PE=1 SV=2	2.62775e+07	6.53686e+06	2.32251e+07	5.67498e+06	28	9
P48678;P21619	46	45	3159.79	0.239064	P48678|LMNA_MOUSE Prelamin-A/C OS=Mus musculus GN=Lmna PE=1 SV=2	2.3773e+08	5.68325e+07	2.10115e+08	4.93392e+07	42	9
P11499;Q9CQN1;Q9D5S7	35	20	2196.69	0.228806	P11499|HS90B_MOUSE Heat shock protein HSP 90-beta OS=Mus musculus GN=Hsp90ab1 PE=1 SV=3	4.0161e+07	9.18909e+06	3.54959e+07	7.97751e+06	32	15
P63017;P17156;P17879	19	15	1246.87	0.228598	P63017|HSP7C_MOUSE Heat shock cognate 71 kDa protein OS=Mus musculus GN=Hspa8 PE=1 SV=1	1.15354e+07	2.63697e+06	1.01954e+07	2.28928e+06	17	6
P58252	25	25	1360.71	0.225636	P58252|EF2_MOUSE Elongation factor 2 OS=Mus musculus GN=Eef2 PE=1 SV=2	2.26141e+07	5.10254e+06	1.99872e+07	4.42977e+06	26	13
P20029	28	22	2049.98	0.225581	P20029|GRP78_MOUSE 78 kDa glucose-regulated protein OS=Mus musculus GN=Hspa5 PE=1 SV=3	2.36411e+07	5.33299e+06	2.08949e+07	4.62983e+06	28	6
P52480;P53657	26	25	1738.8	0.223786	P52480|KPYM_MOUSE Pyruvate kinase PKM OS=Mus musculus GN=Pkm PE=1 SV=4	9.28393e+07	2.07761e+07	8.20551e+07	1.80368e+07	38	14
Q9QXS1	34	31	1633.3	0.0528641	Q9QXS1|PLEC_MOUSE Plectin OS=Mus musculus GN=Plec PE=1 SV=3	8.2695e+06	437160	7.30892e+06	379521	31	2
Q99JR5	11	11	908.39	0.201054	Q99JR5|TINAL_MOUSE Tubulointerstitial nephritis antigen-like OS=Mus musculus GN=Tinagl1 PE=1 SV=1	5.60823e+07	1.12756e+07	4.95678e+07	9.78891e+06	23	11
P35700	10	7	388.19	0.198741	P35700|PRDX1_MOUSE Peroxiredoxin-1 OS=Mus musculus GN=Prdx1 PE=1 SV=1	1.08442e+07	2.15518e+06	9.58451e+06	1.87102e+06	8	3
P97873	11	11	1052.55	0.197208	P97873|LOXL1_MOUSE Lysyl oxidase homolog 1 OS=Mus musculus GN=Loxl1 PE=2 SV=3	4.02848e+07	7.94448e+06	3.56054e+07	6.897e+06	22	7
A2ASQ1	10	10	547.31	0.193186	A2ASQ1|AGRIN_MOUSE Agrin OS=Mus musculus GN=Agrn PE=1 SV=1	1.68047e+07	3.24644e+06	1.48527e+07	2.81839e+06	10	3
Q8BTM8	41	36	2448.49	0.0593769	Q8BTM8|FLNA_MOUSE Filamin-A OS=Mus musculus GN=Flna PE=1 SV=5	3.13121e+07	1.85922e+06	2.76749e+07	1.61408e+06	33	2
P21981	14	14	926.58	0.188134	P21981|TGM2_MOUSE Protein-glutamine gamma-glutamyltransferase 2 OS=Mus musculus GN=Tgm2 PE=1 SV=4	3.56809e+07	6.71279e+06	3.15362e+07	5.82771e+06	18	7
O88342;Q7M707	17	17	1127.58	0.184997	O88342|WDR1_MOUSE WD repeat-containing protein 1 OS=Mus musculus GN=Wdr1 PE=1 SV=3	1.10308e+07	2.04067e+06	9.74948e+06	1.7716e+06	19	4
P42932	17	16	938.25	0.16772	P42932|TCPQ_MOUSE T-complex protein 1 subunit theta OS=Mus musculus GN=Cct8 PE=1 SV=3	1.10159e+07	1.8476e+06	9.73633e+06	1.60399e+06	15	3
P14211	7	7	438.36	0.162274	P14211|CALR_MOUSE Calreticulin OS=Mus musculus GN=Calr PE=1 SV=1	5.46009e+06	886033	4.82585e+06	769210	8	4
P62806	8	8	548.37	0.159358	P62806|H4_MOUSE Histone H4 OS=Mus musculus GN=Hist1h4a PE=1 SV=2	9.77998e+07	1.55852e+07	8.64394e+07	1.35303e+07	24	9
P27773	15	15	849.29	0.158793	P27773|PDIA3_MOUSE Protein disulfide-isomerase A3 OS=Mus musculus GN=Pdia3 PE=1 SV=2	3.47869e+07	5.5239e+06	3.0746e+07	4.79558e+06	22	4
P07901	29	15	1843.81	0.155358	P07901|HS90A_MOUSE Heat shock protein HSP 90-alpha OS=Mus musculus GN=Hsp90aa1 PE=1 SV=4	2.25193e+07	3.49855e+06	1.99034e+07	3.03727e+06	21	9
P09411	18	15	1375.62	0.152671	P09411|PGK1_MOUSE Phosphoglycerate kinase 1 OS=Mus musculus GN=Pgk1 PE=1 SV=4	2.65985e+07	4.0608e+06	2.35088e+07	3.52539e+06	21	3
P28656	5	4	275.23	0.135653	P28656|NP1L1_MOUSE Nucleosome assembly protein 1-like 1 OS=Mus musculus GN=Nap1l1 PE=1 SV=2	1.78996e+06	242813	1.58204e+06	210799	2	3
P53996	9	9	863.17	0.119236	P53996|CNBP_MOUSE Cellular nucleic acid-binding protein OS=Mus musculus GN=Cnbp PE=1 SV=2	3.29618e+07	3.93024e+06	2.9133e+07	3.41204e+06	16	8
P11983	12	12	864.47	0.115535	P11983|TCPA_MOUSE T-complex protein 1 subunit alpha OS=Mus musculus GN=Tcp1 PE=1 SV=3	8.6793e+06	1.00276e+06	7.67112e+06	870546	14	5
P80318	13	12	682.77	0.111708	P80318|TCPG_MOUSE T-complex protein 1 subunit gamma OS=Mus musculus GN=Cct3 PE=1 SV=1	8.02592e+06	896561	7.09363e+06	778350	12	3
P08113	34	32	2511.37	0.103649	P08113|ENPL_MOUSE Endoplasmin OS=Mus musculus GN=Hsp90b1 PE=1 SV=2	9.3479e+07	9.68897e+06	8.26205e+07	8.41148e+06	54	14
P18760	5	4	470.86	0.094679	P18760|COF1_MOUSE Cofilin-1 OS=Mus musculus GN=Cfl1 PE=1 SV=3	2.03579e+07	1.92747e+06	1.79932e+07	1.67333e+06	8	3
P09103;Q8BUV8;Q8CII2	17	16	1047.76	0.0823059	P09103|PDIA1_MOUSE Protein disulfide-isomerase OS=Mus musculus GN=P4hb PE=1 SV=2	3.43513e+07	2.82731e+06	3.0361e+07	2.45453e+06	25	9
P40142	18	17	1317.25	0.0809733	P40142|TKT_MOUSE Transketolase OS=Mus musculus GN=Tkt PE=1 SV=1	5.05184e+07	4.09064e+06	4.46502e+07	3.55129e+06	29	6
P17182;P21550;P17183	17	17	1465.69	0.0780537	P17182|ENOA_MOUSE Alpha-enolase OS=Mus musculus GN=Eno1 PE=1 SV=3	7.22933e+07	5.64276e+06	6.38958e+07	4.89877e+06	32	8
Q91W90	14	14	921.43	0.0775869	Q91W90|TXND5_MOUSE Thioredoxin domain-containing protein 5 OS=Mus musculus GN=Txndc5 PE=1 SV=2	2.57711e+08	1.9995e+07	2.27776e+08	1.73587e+07	33	5
Q9DCD0	12	12	917	0.0646404	Q9DCD0|6PGD_MOUSE 6-phosphogluconate dehydrogenase, decarboxylating OS=Mus musculus GN=Pgd PE=1 SV=3	3.37549e+07	2.18193e+06	2.9834e+07	1.89425e+06	18	4
Q8BHN3	12	12	608.32	0.0584009	Q8BHN3|GANAB_MOUSE Neutral alpha-glucosidase AB OS=Mus musculus GN=Ganab PE=1 SV=1	4.099e+06	239385	3.62286e+06	207823	12	3
P19324	16	16	1201.68	0.0543245	P19324|SERPH_MOUSE Serpin H1 OS=Mus musculus GN=Serpinh1 PE=1 SV=3	3.7939e+07	2.06102e+06	3.3532e+07	1.78927e+06	20	7
P14869	7	6	458.37	0.0365044	P14869|RLA0_MOUSE 60S acidic ribosomal protein P0 OS=Mus musculus GN=Rplp0 PE=1 SV=3	7.40689e+06	270384	6.54651e+06	234734	8	3
